# Supplementary material for: Thiazolidin-4-Ones as Potential Antimicrobial Agents: Experimental and In Silico Evaluation
Source: MDPI journal article supplement (doi:10.3390/molecules27061930), 2022-03-16

# Thiazolidin-4-ones as potential antimicrobial agents: Experimental and in silico evaluation

Christophe Tratat <sup>1\*</sup>, Anthi Petrou, <sup>2</sup> Athina Geronikaki, <sup>\*2</sup> Marija Ivanov <sup>3</sup>, Marina Sokovic <sup>3</sup> Ioannis S. Vizirianakis <sup>4,5</sup> Nikoleta F. Theodoroula <sup>4</sup> and Michelyne Haroun <sup>1</sup>

<sup>1</sup> Department of Pharmaceutical Sciences, College of Clinical Pharmacy, King Faisal University, Al-Ahsa 31982, Saudi Arabia; mharoun@kfu.edu.sa (M.H.);

<sup>2</sup> Department of Pharmaceutical Chemistry, School of Pharmacy, Aristotle University of Thessaloniki, 54124 Thessaloniki, Greece; geronik@pharm.auth.gr; anthi.petrou.thessaloniki1@gmail.com

<sup>3</sup> Mycological Laboratory, Department of Plant Physiology, Institute for Biological Research, Siniša Stankovic-National Institute of Republic of Serbia, University of Belgrade, Bulevar Despota Stefana 142, 11000 Belgrade, Serbia; marija.smiljkovic@ibiss.bg.ac.rs (M.I.); marina.kostic@ibiss.bg.ac.rs (M.K.); mris@ibiss.bg.ac.rs (M.D.S.)

<sup>4</sup> Laboratory of Pharmacology, School of Pharmacy, Aristotle University of Thessaloniki, GR-54124 Thessaloniki, Greece; theodorn@pharm.auth.gr (N.F.T.); ivizir@pharm.auth.gr (I.S.V.)

<sup>5</sup> Department of Life and Health Sciences, University of Nicosia, CY-1700 Nicosia, Cyprus.

\* Correspondence: geronik@pharm.auth.gr; Tel.: +302301997616

## *General procedure for the synthesis of thiazolidinones by conventional method*

The appropriate heteroaromatic amine (1.0 mmol) and substituted benzaldehyde (1.2 mmol) were stirred in dry toluene under reflux followed by addition of mercatoacetic acid (2.0 mmol). The reaction mixture was refluxed for 18–32 hours and then concentrated to dryness under reduce pressure. The residue was diluted in ethyl acetate and the organic layer was washed with 5% aq citric acid, water and 5% aq sodium hydrogen carbonate. The organic layer was dried over sodium sulfate and concentrated under reduced pressure. All the synthesized compounds were characterized by TLC, <sup>1</sup>H-NMR and <sup>13</sup>C-NMR.

# $^1\text{H}$ -NMR and $^{13}\text{C}$ -NMR of compounds

## Compound 1

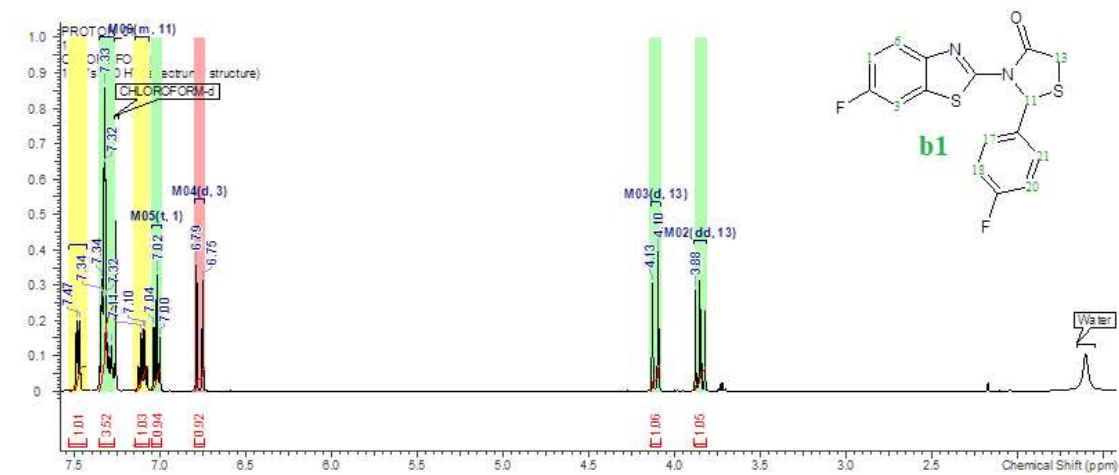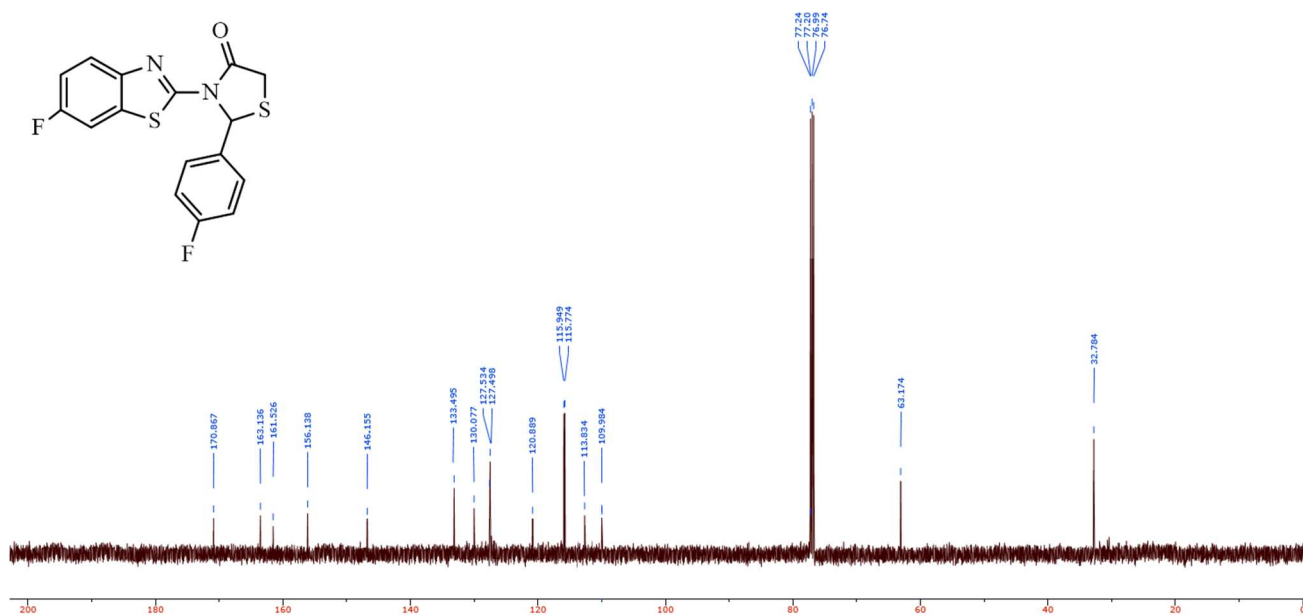

# Compound 2

Ένωση b2-1H-NMR

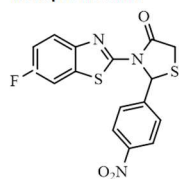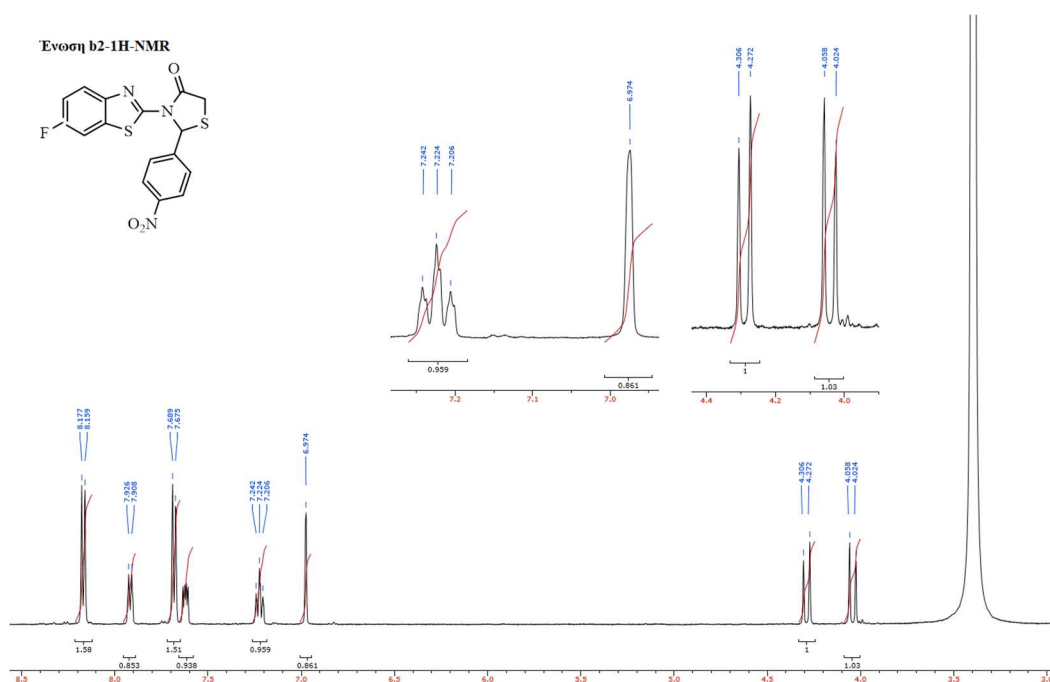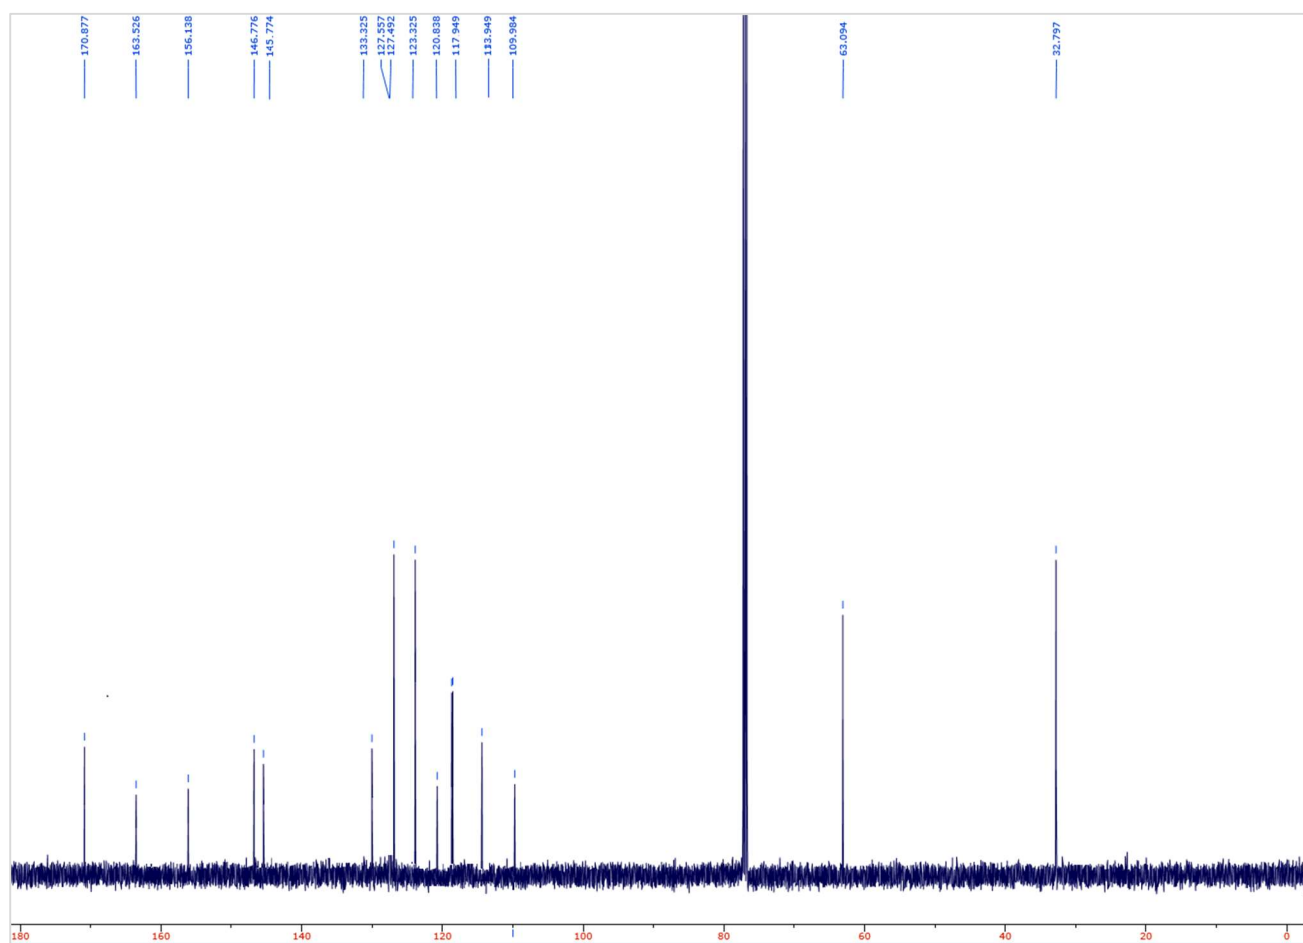

# Compound 3

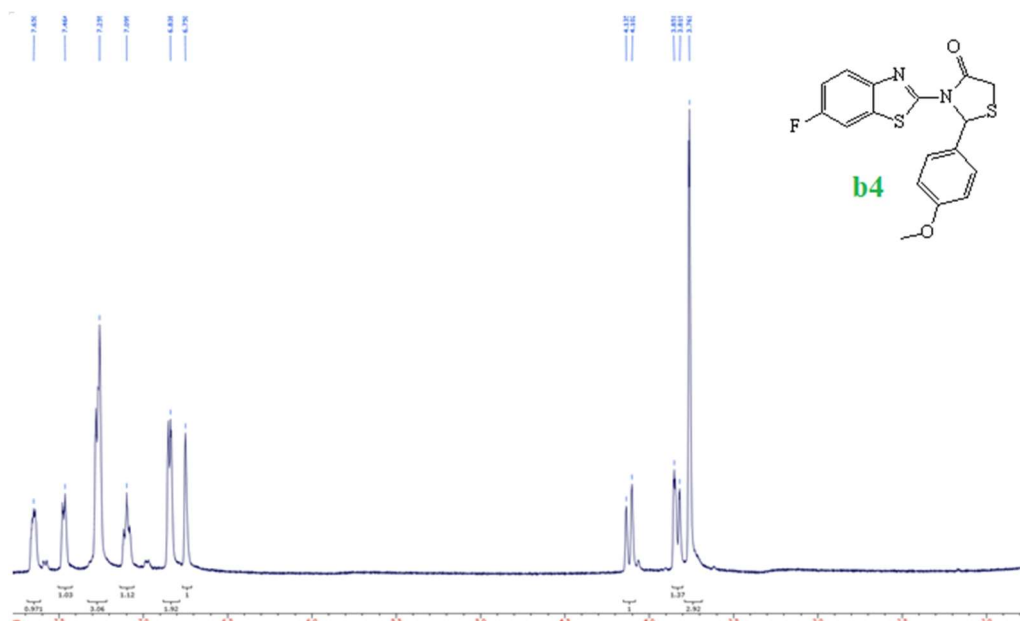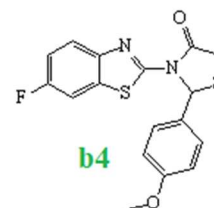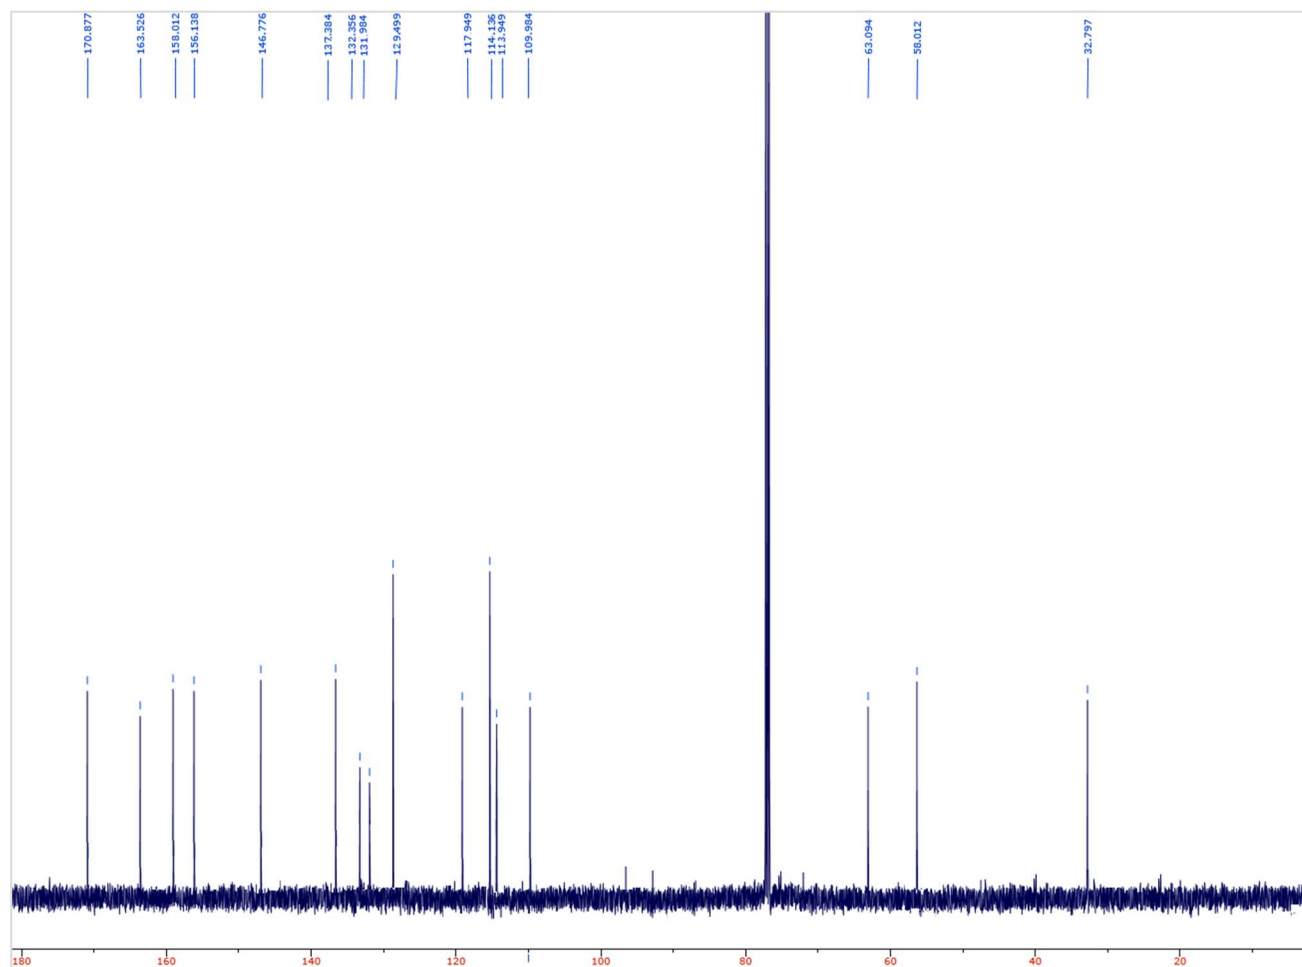

## Compound 4

Evosyl d1 1H-NMR

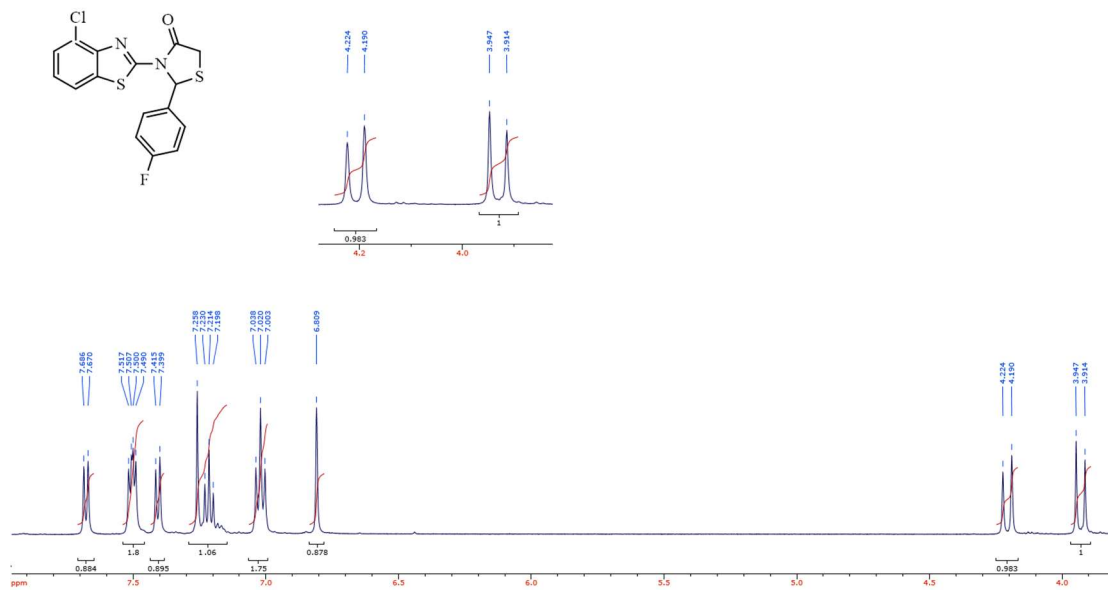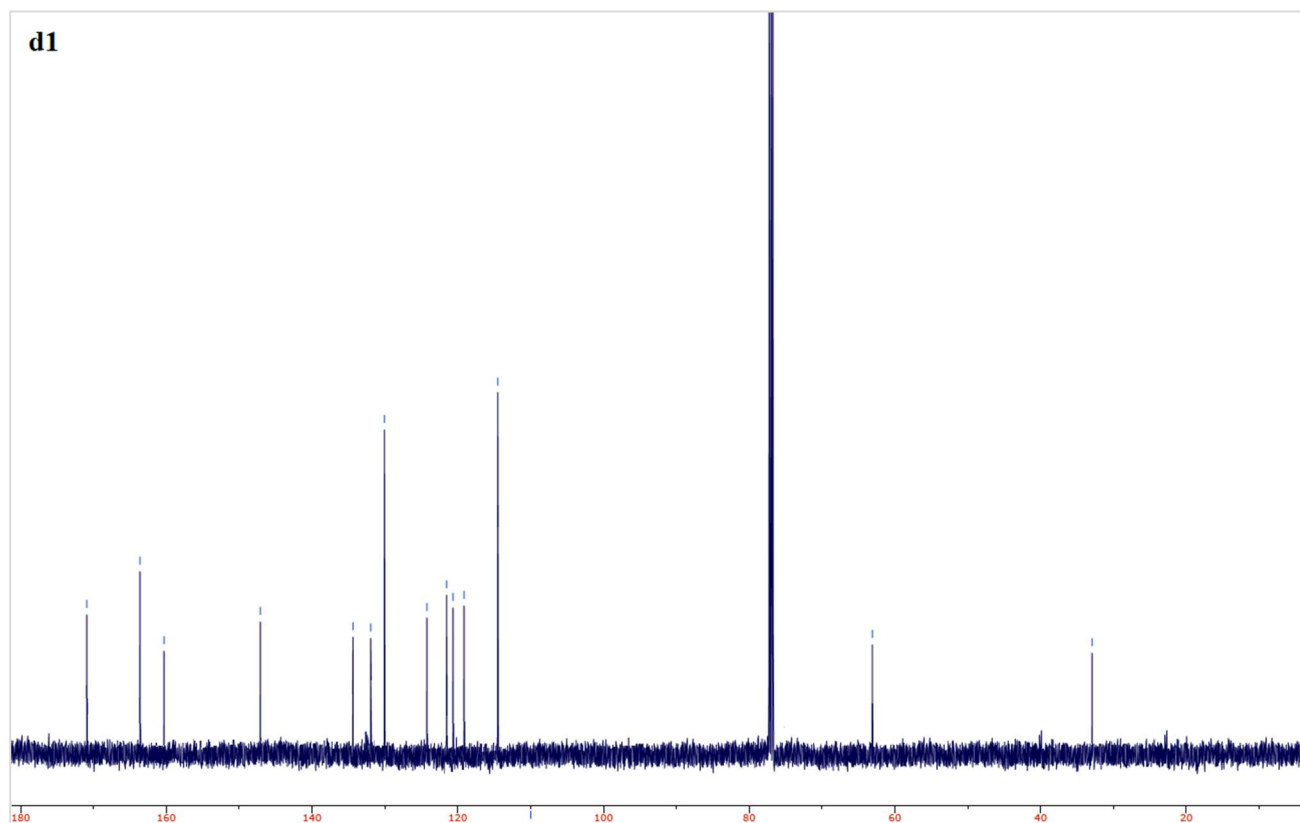

# Compound 5

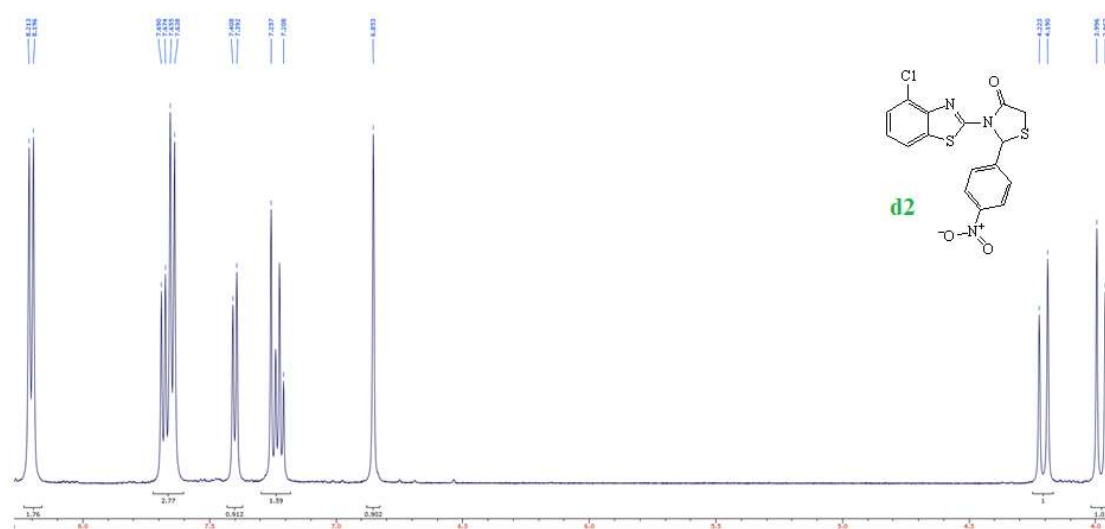

d2

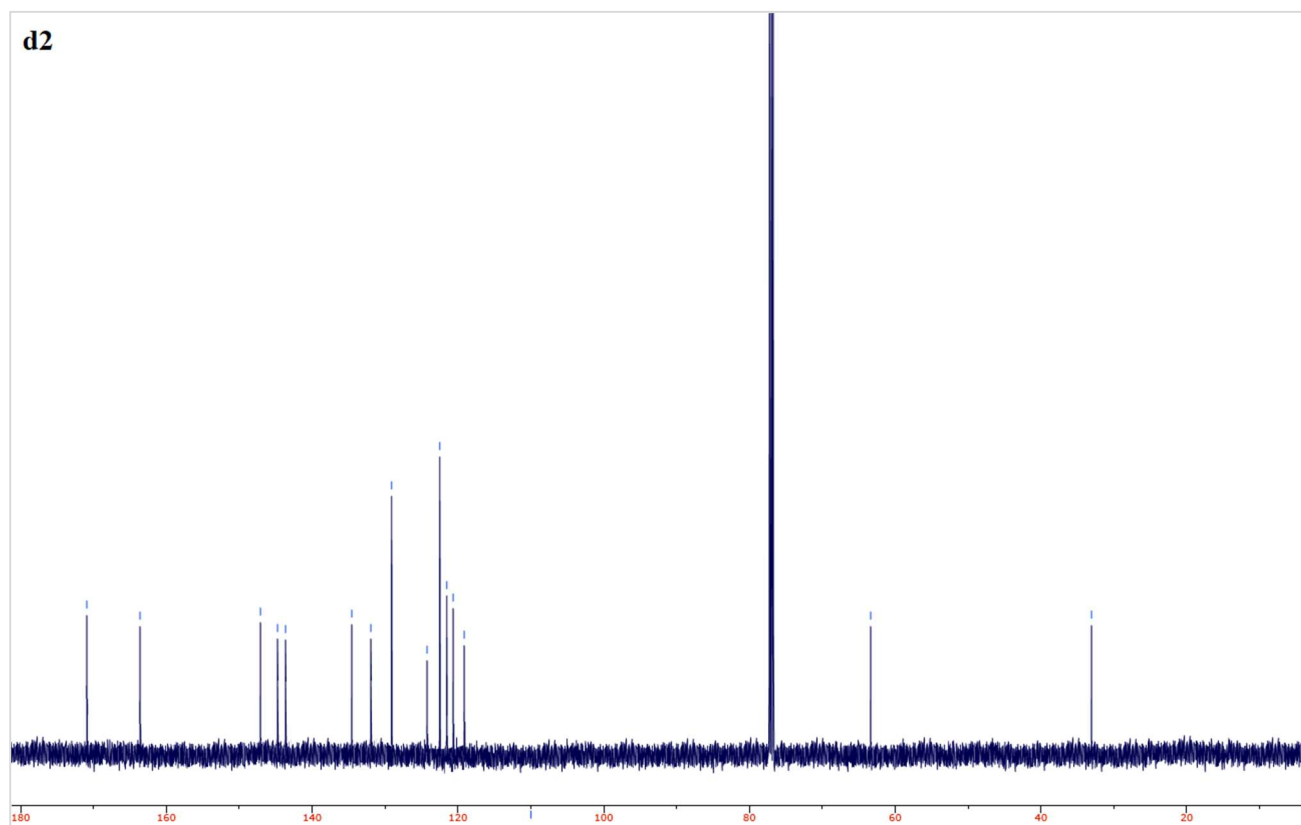

# Compound 6

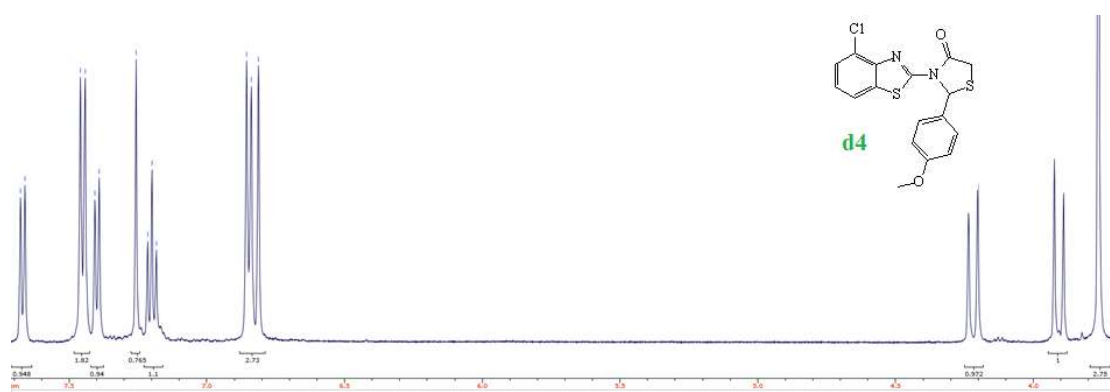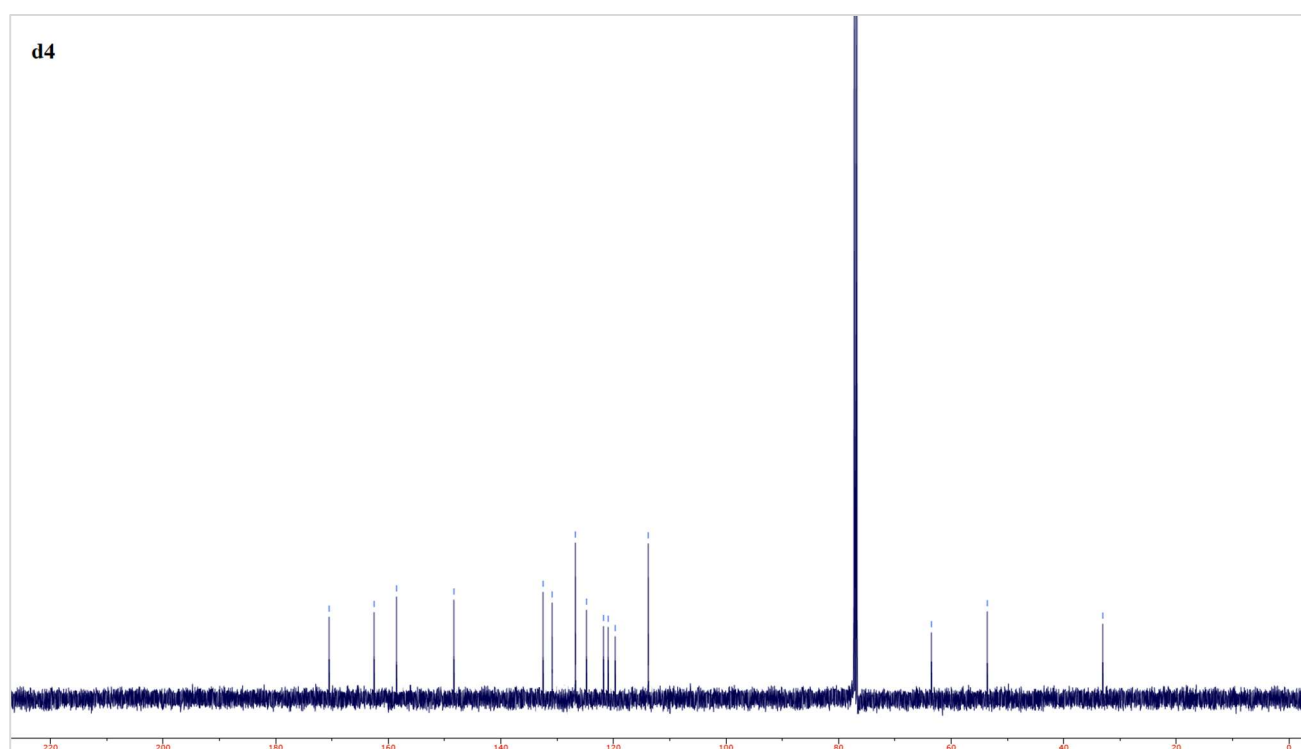

# Compound 7

Ενότητα f1 1H-NMR

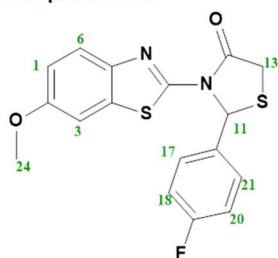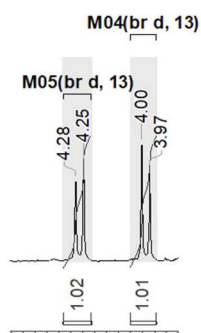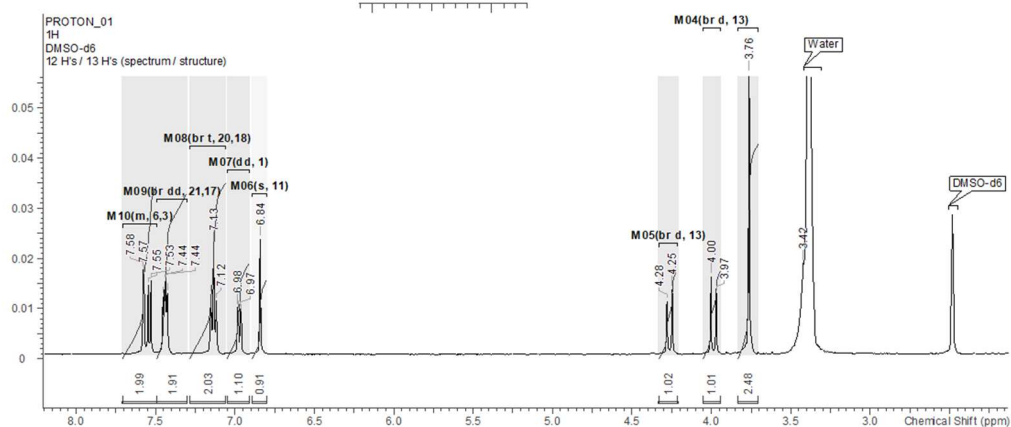

f1

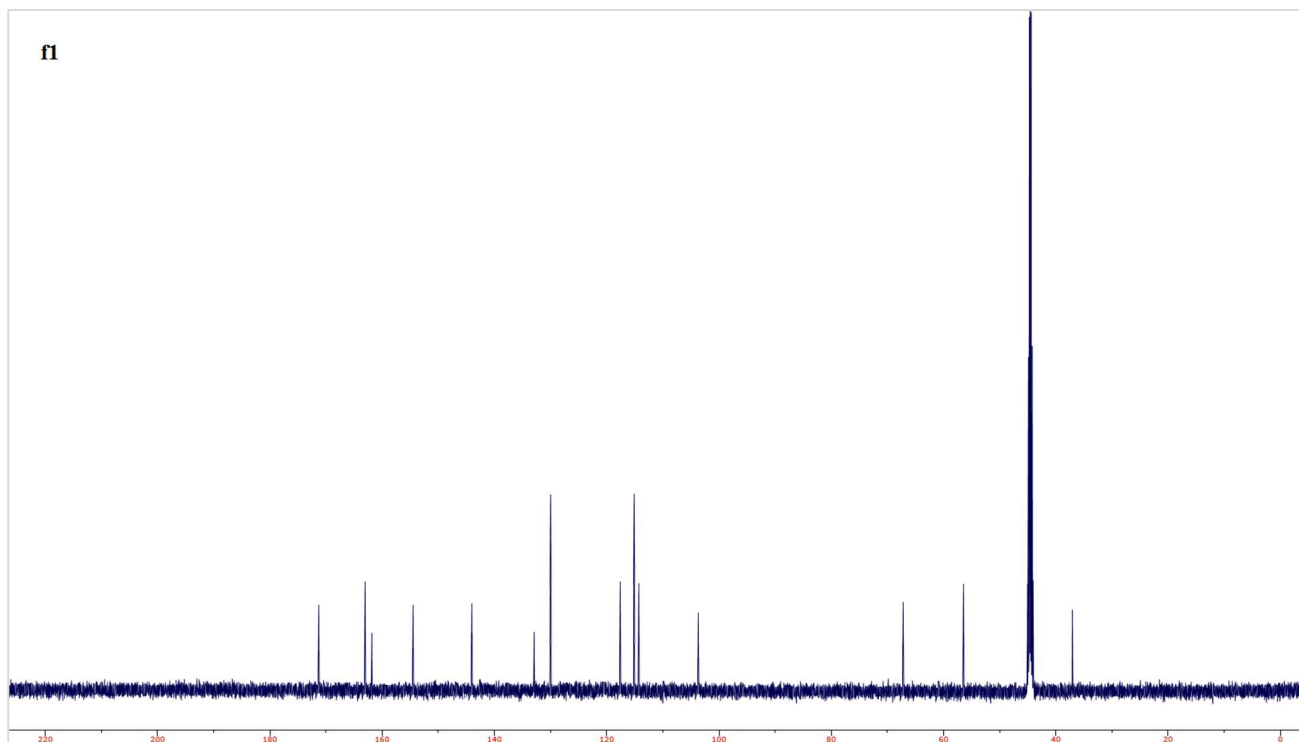



# Compound 8

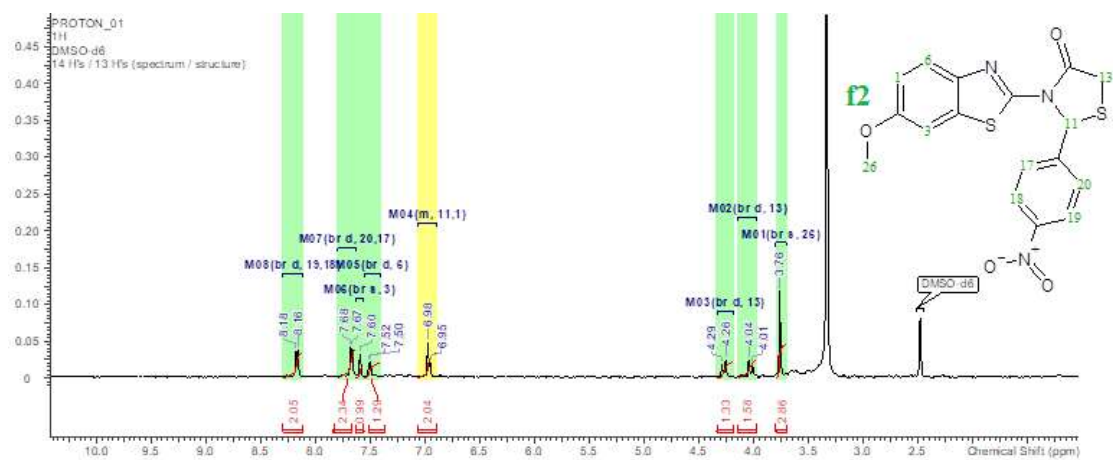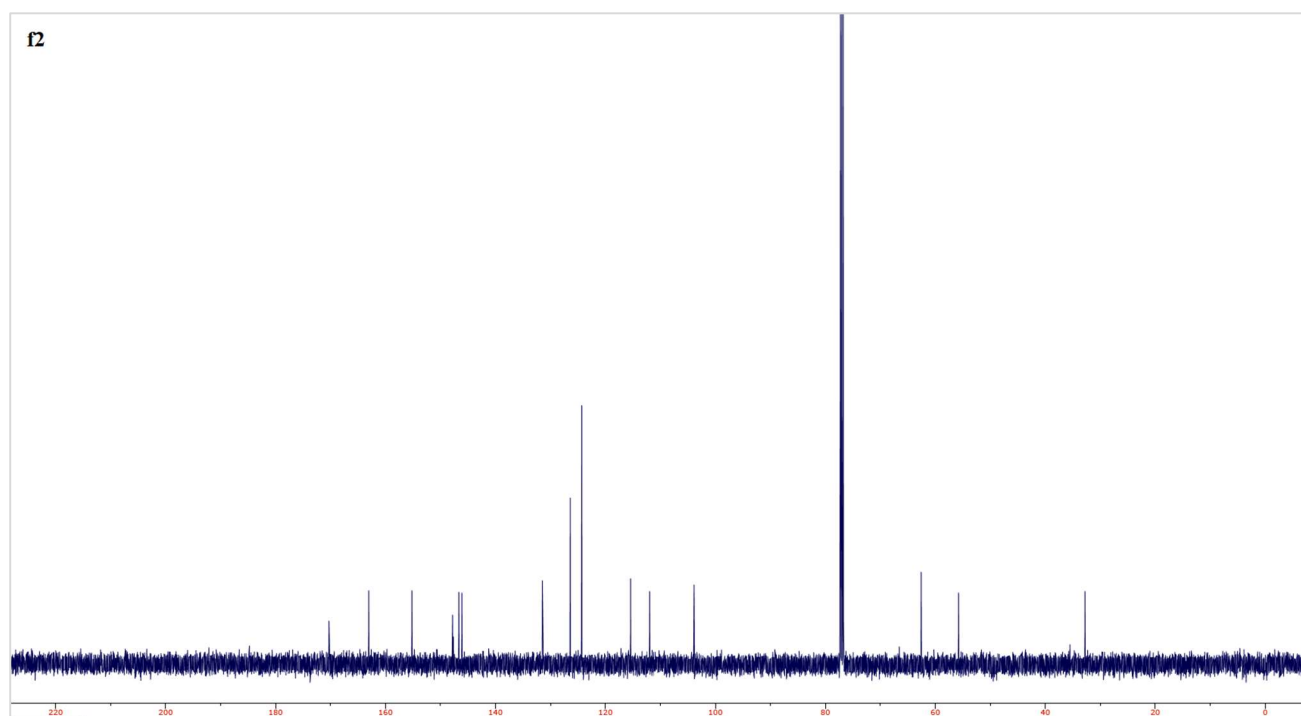

## Compound 9

Ένωση f3 1H-NMR

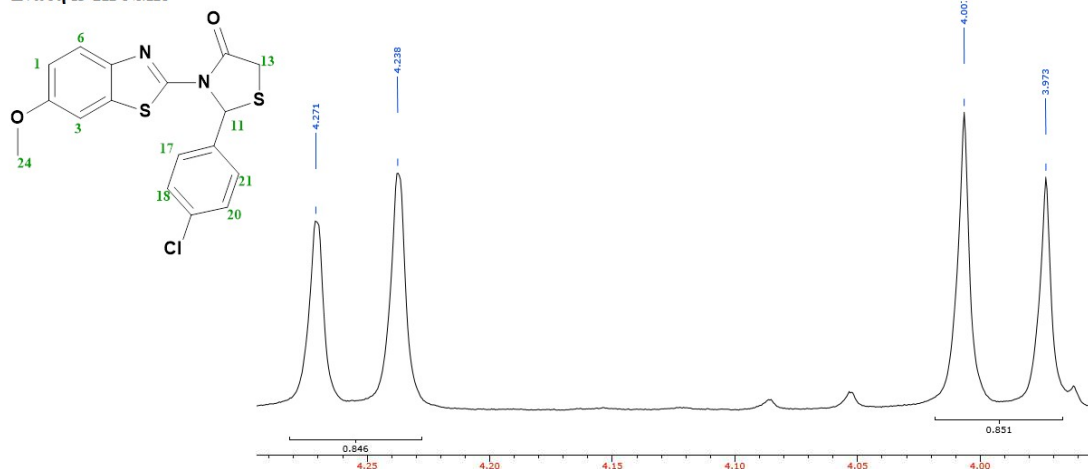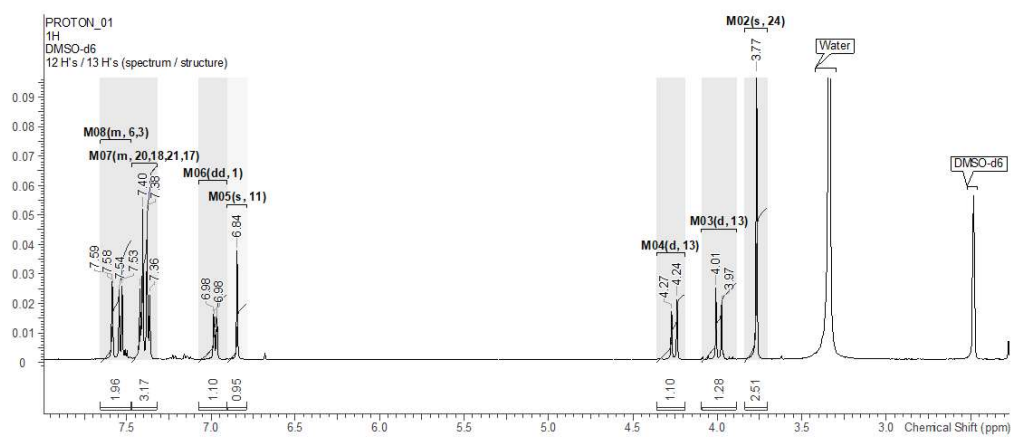

f3

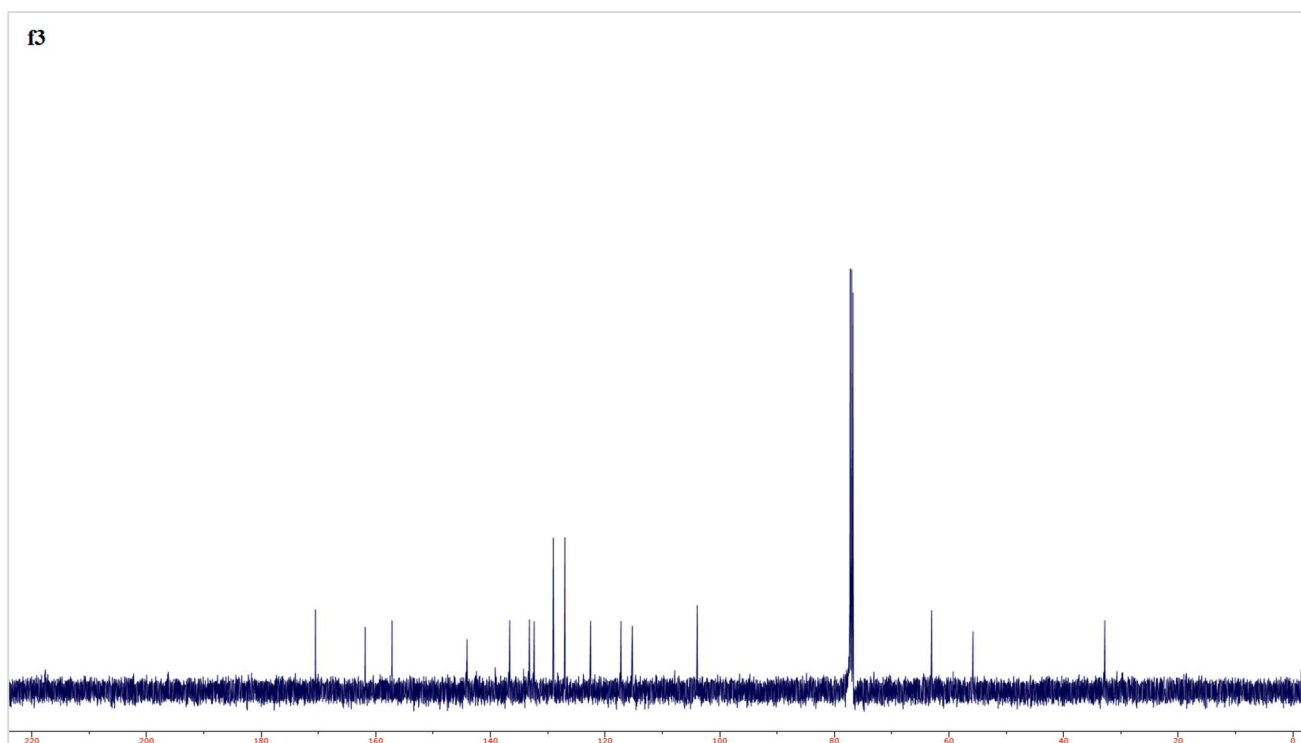

### Compound 10

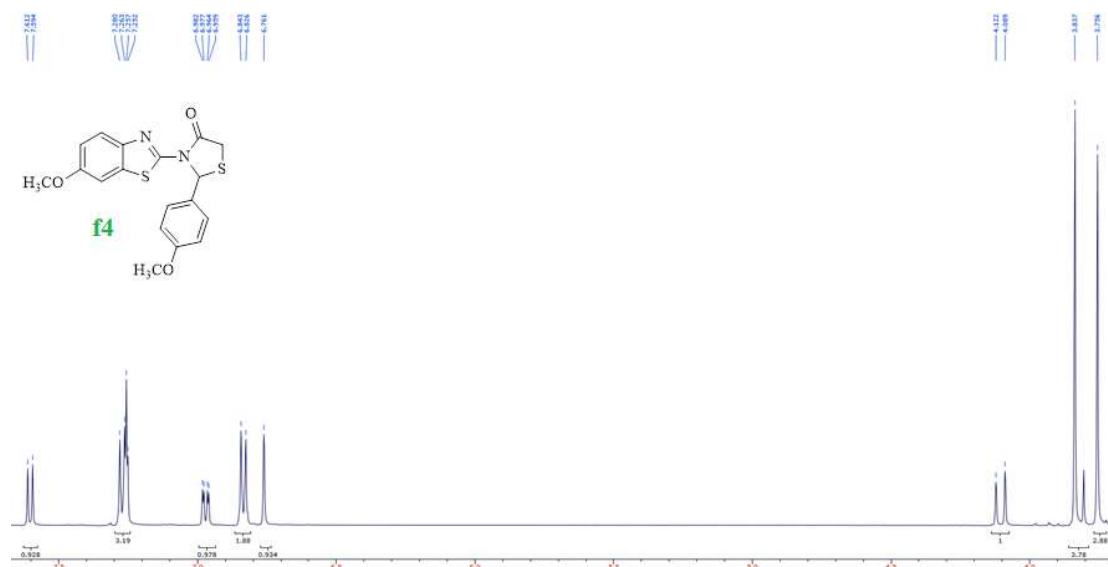

### Ένωση f4 13 C-NMR

CARBON\_01  
f4\_1H-13C

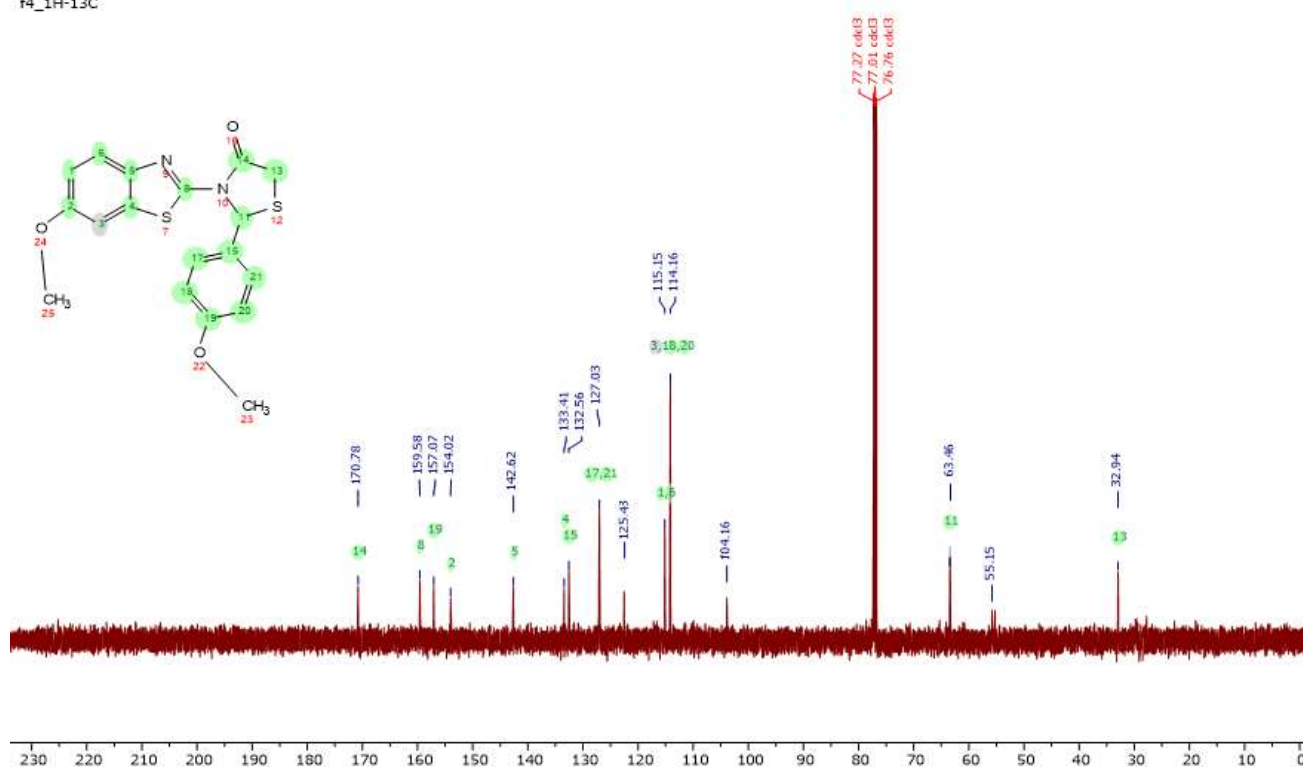

## Compound 11

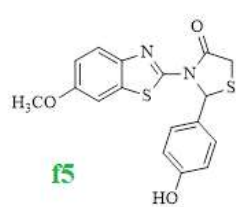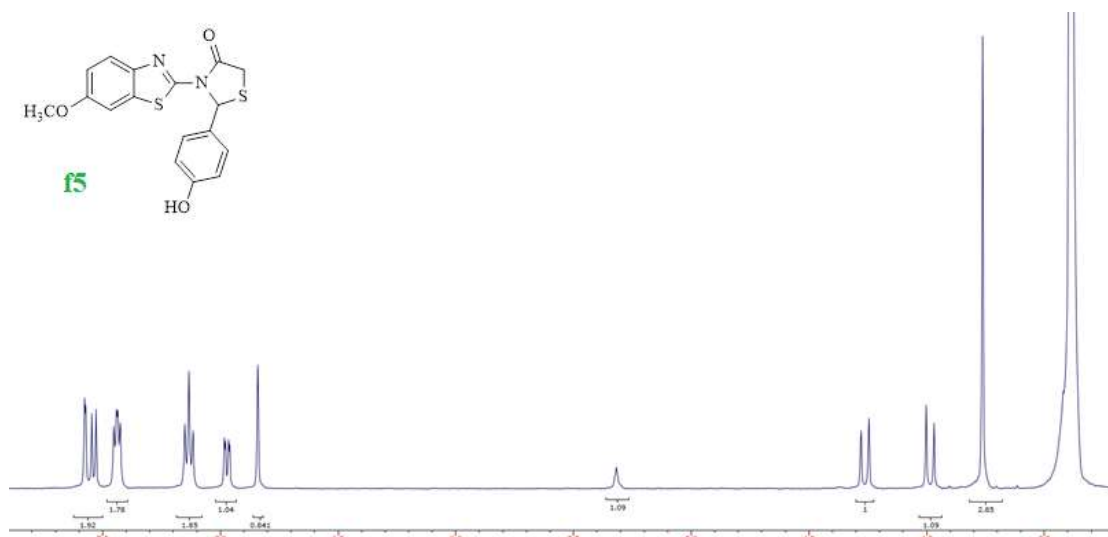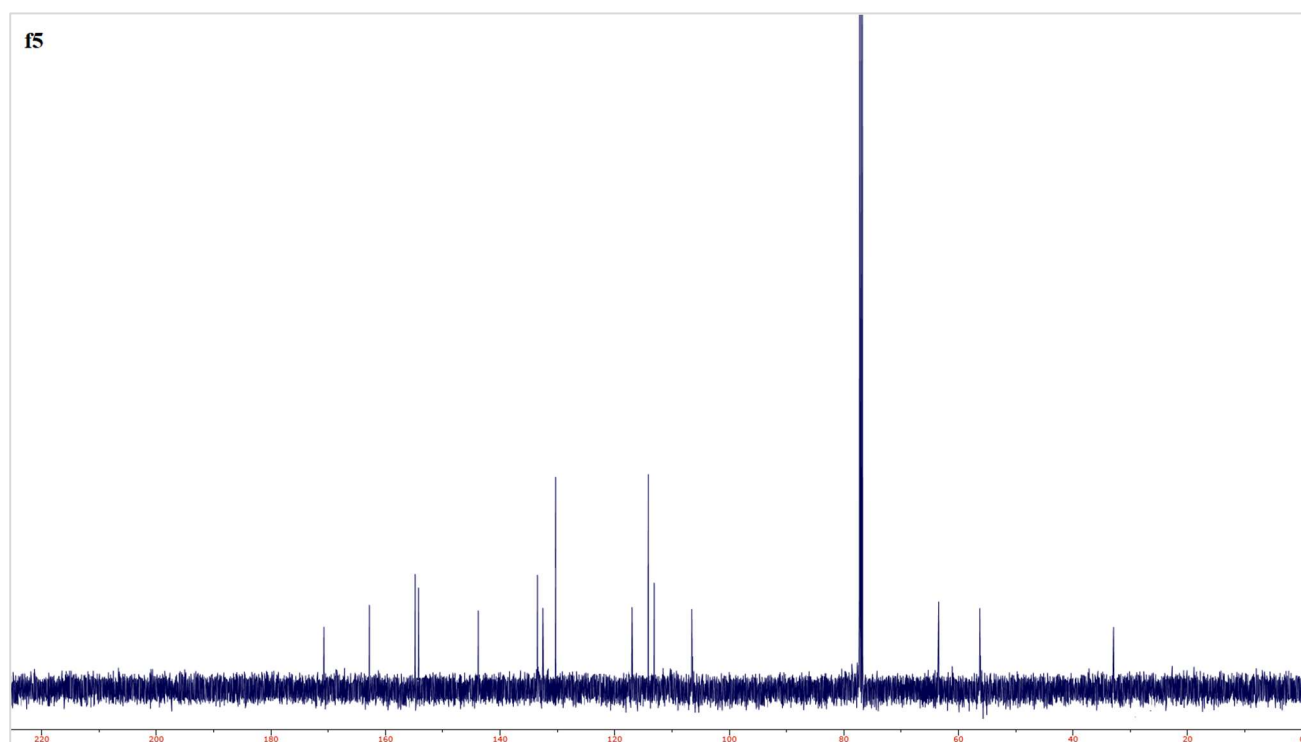

## Compound 12

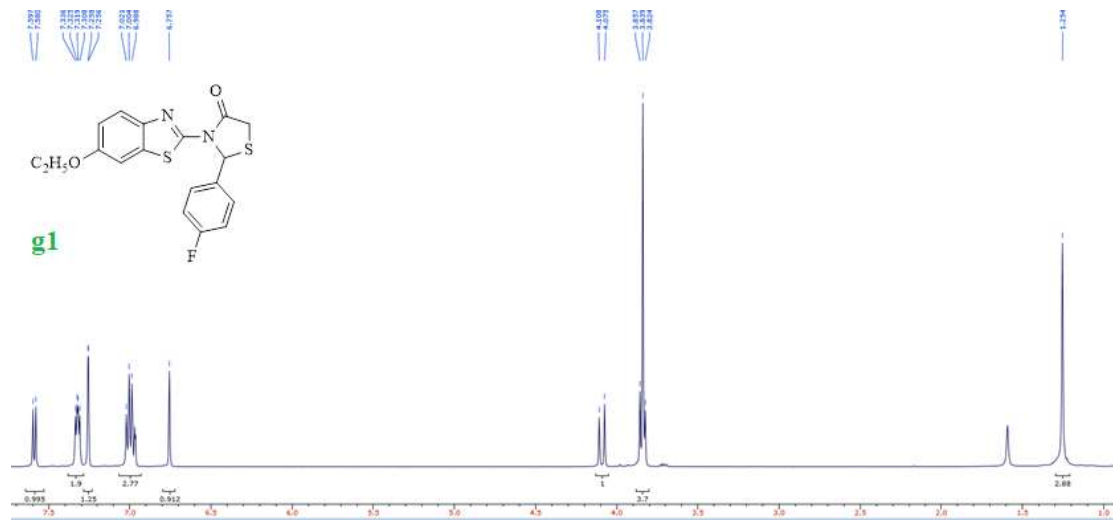

### Ένωση g1 13C-NMR

CARBON\_01  
g1\_1h-13c

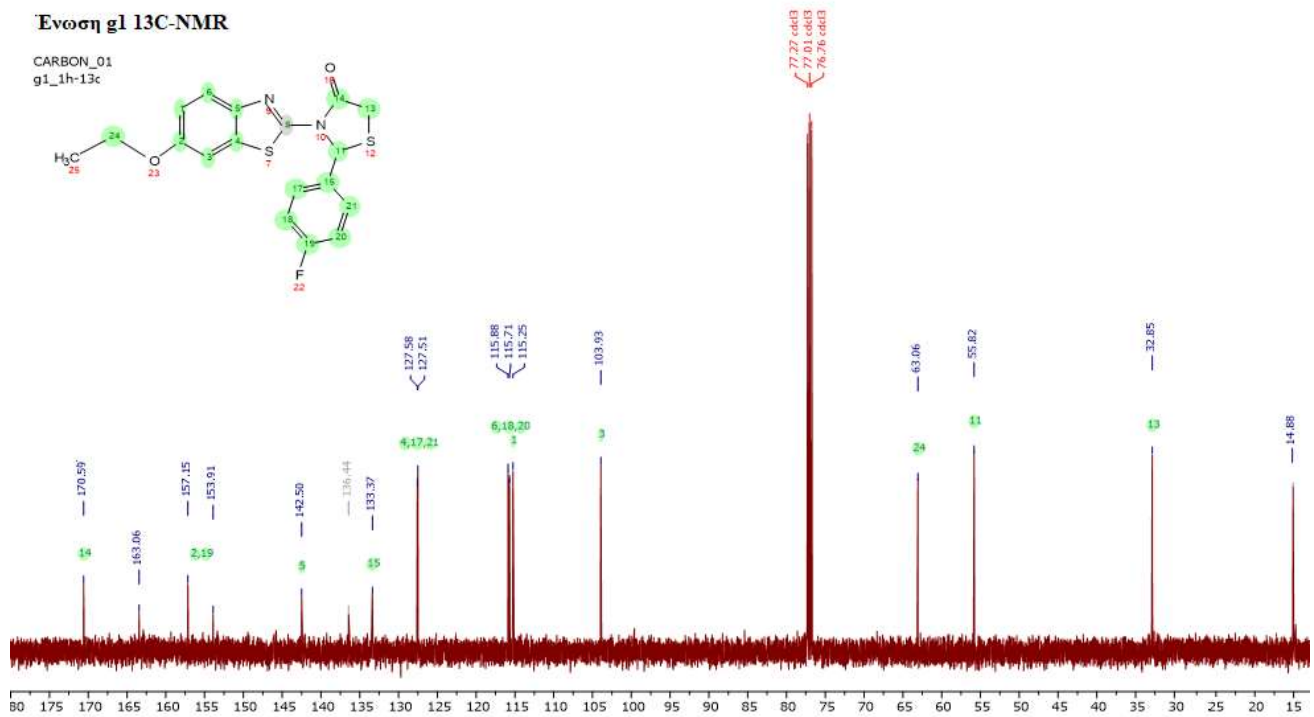

# Compound 13

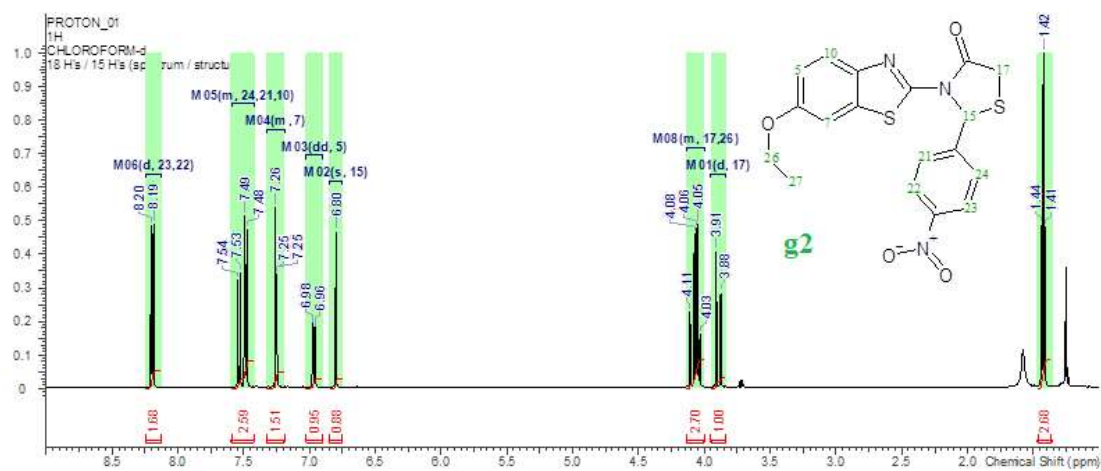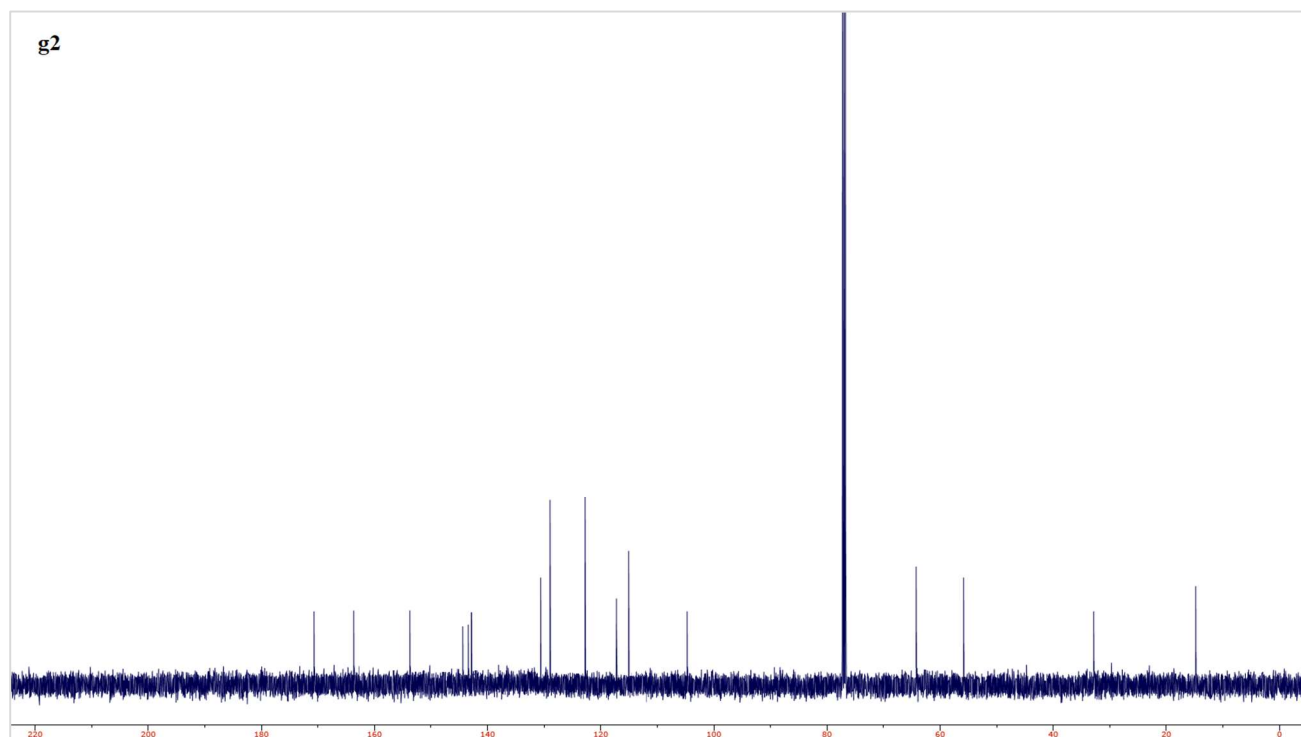

### Compound 14

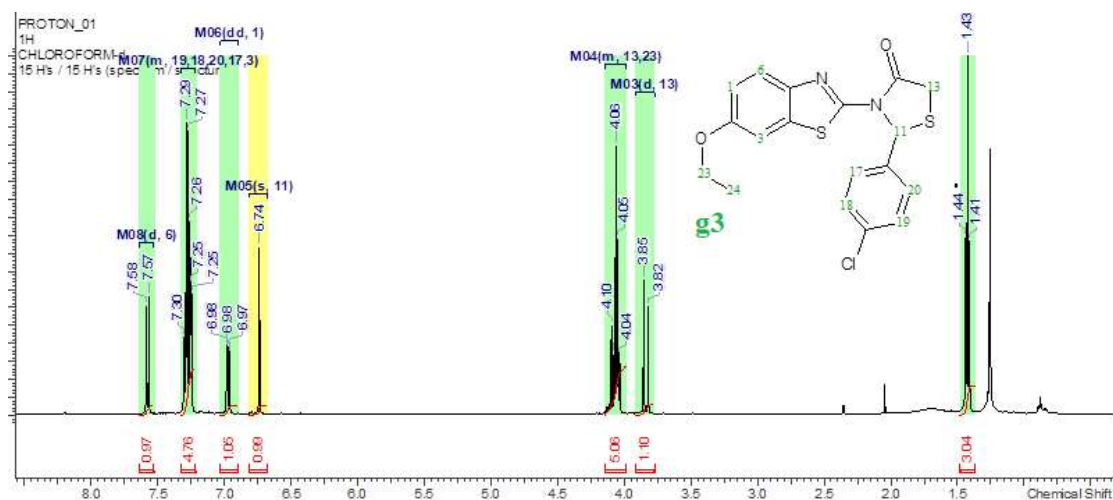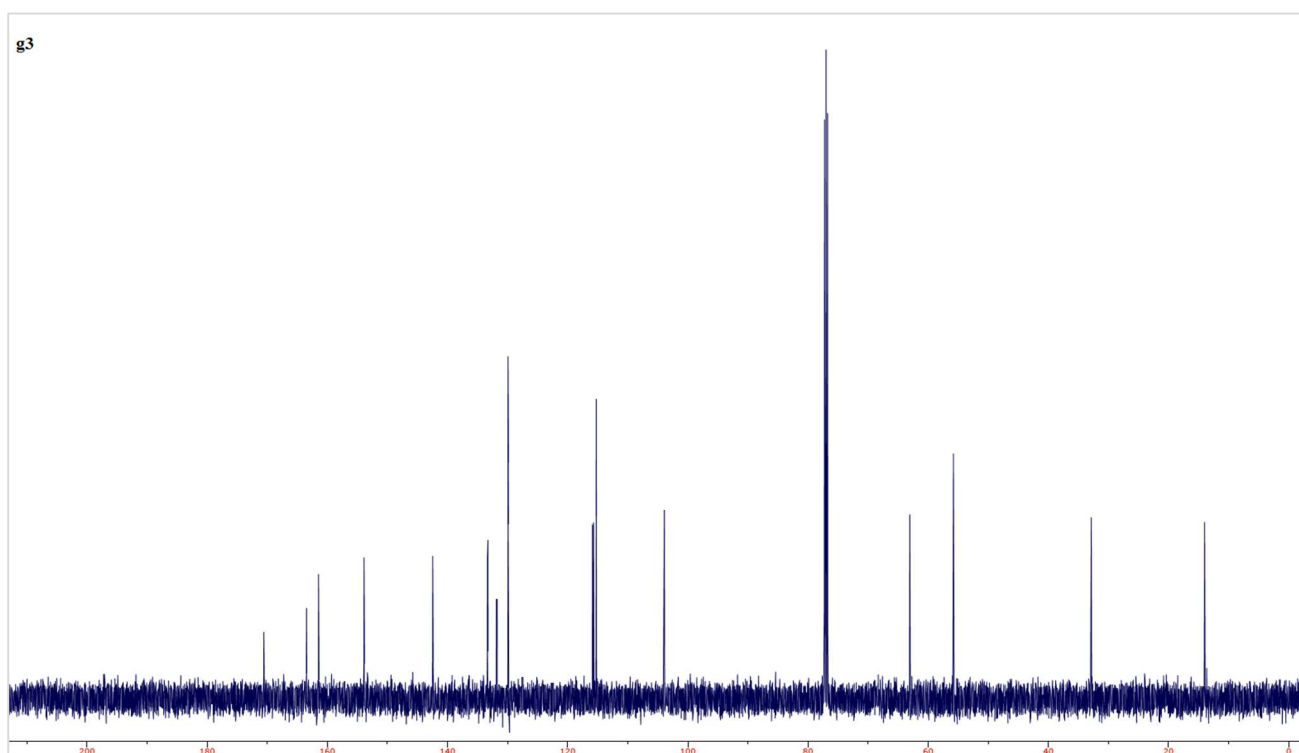

# Compound 15

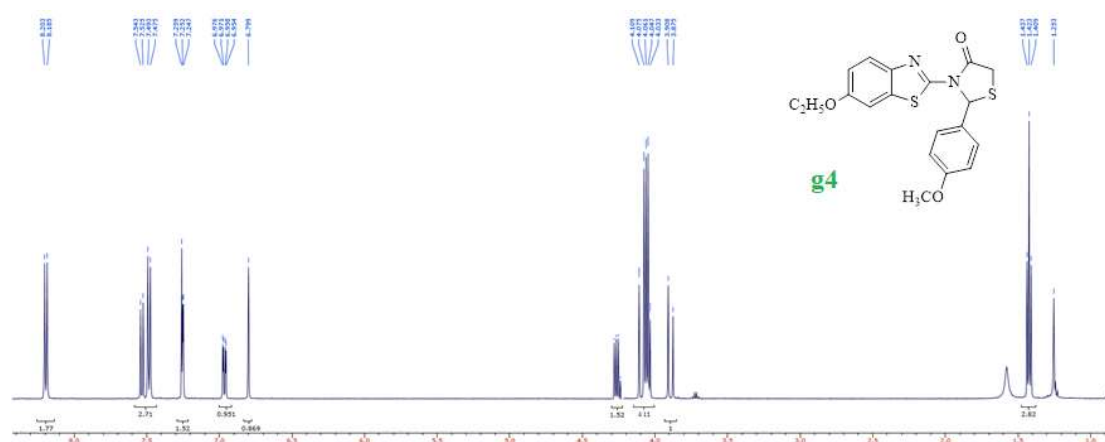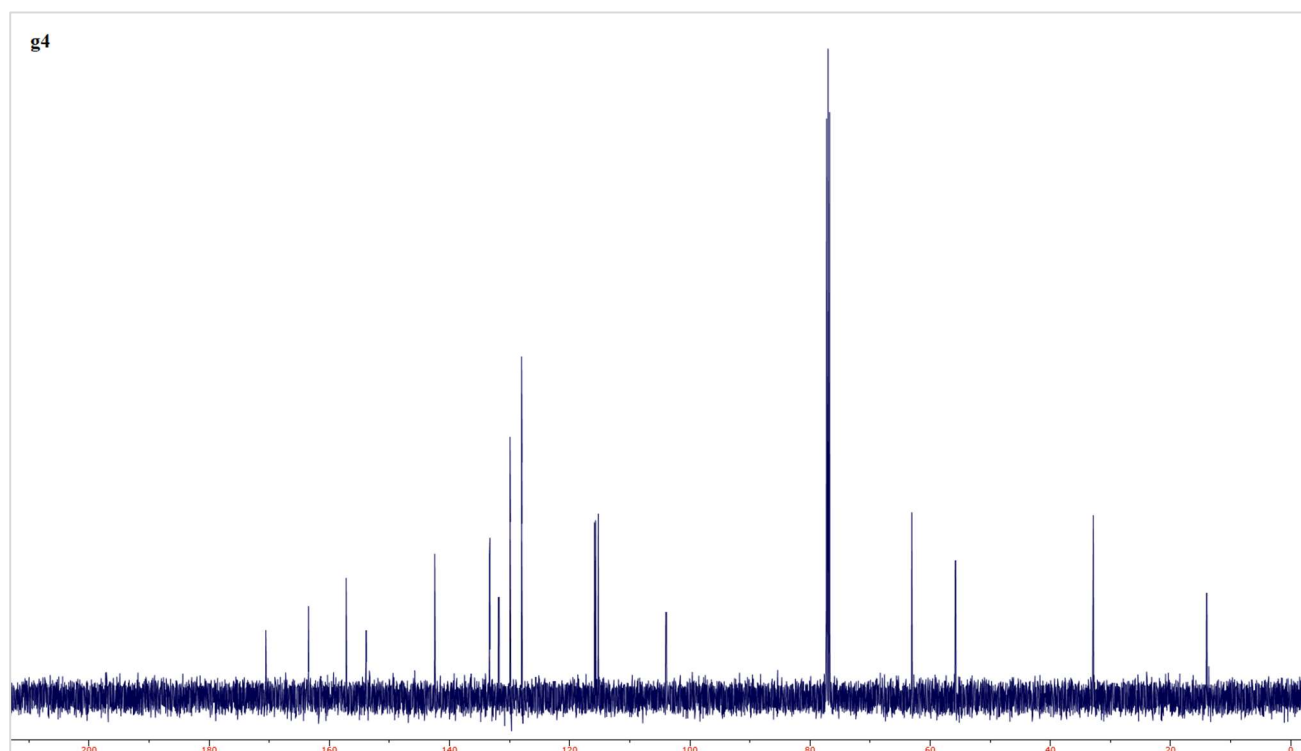



# Compound 16

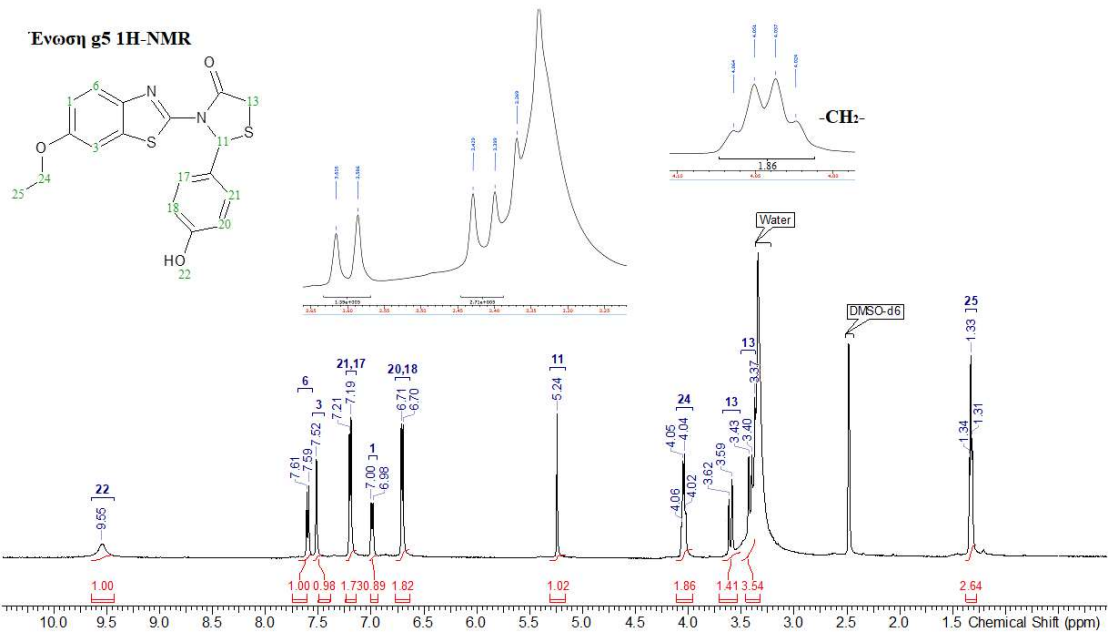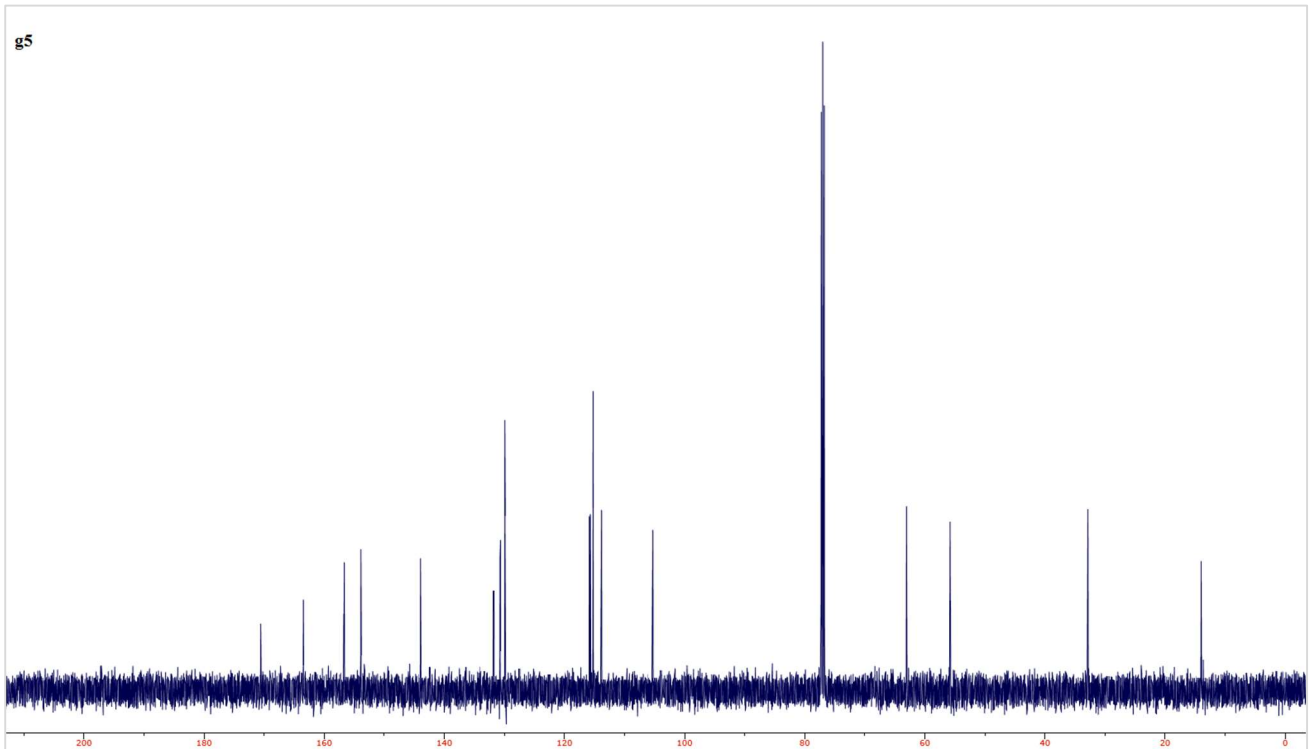

# Compound 17

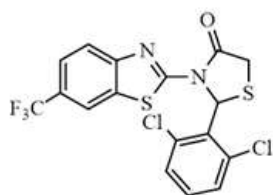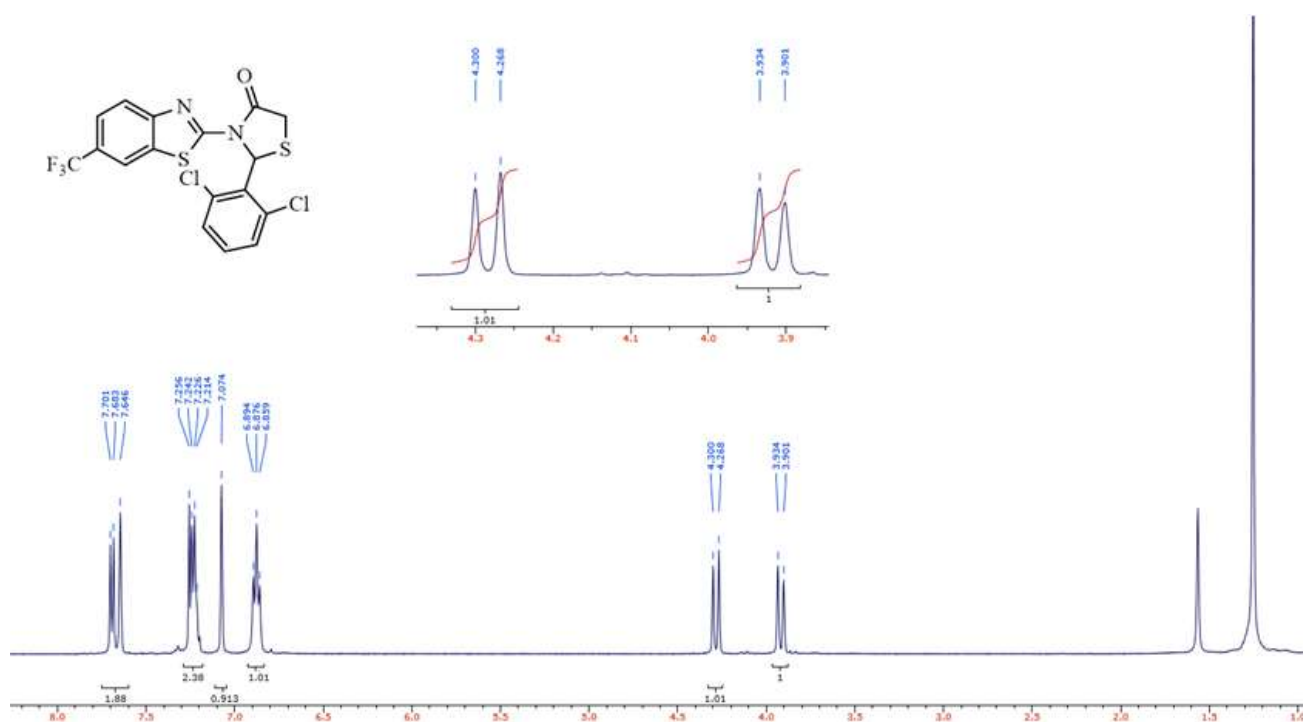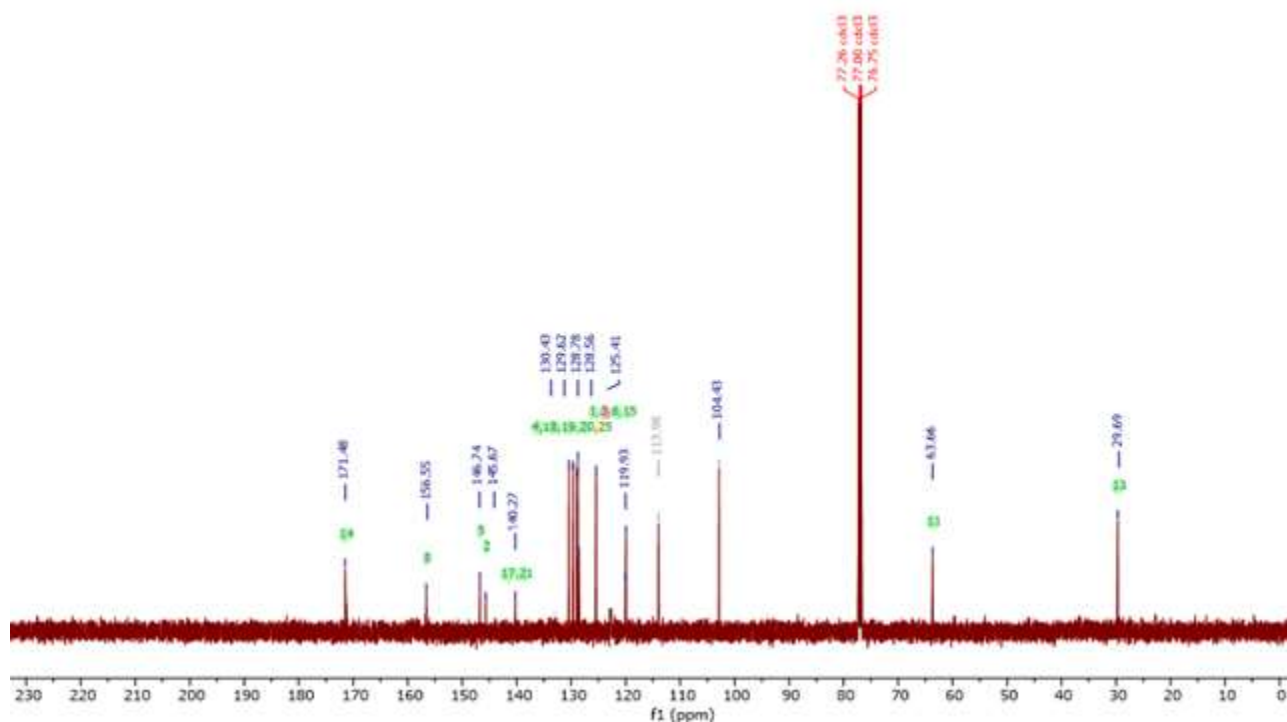

## Compound 18

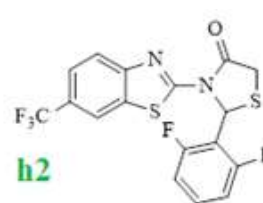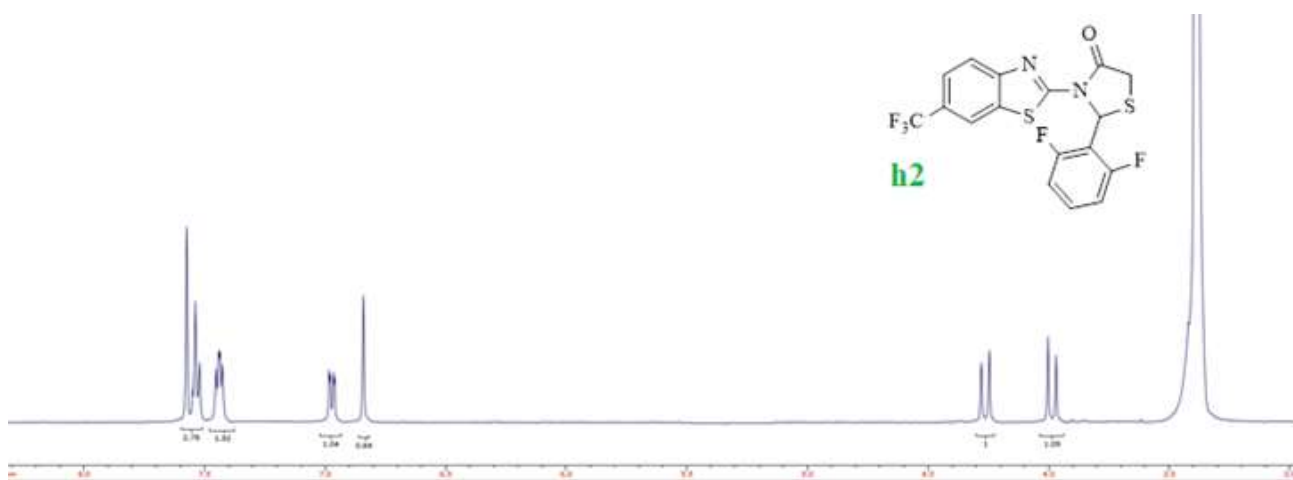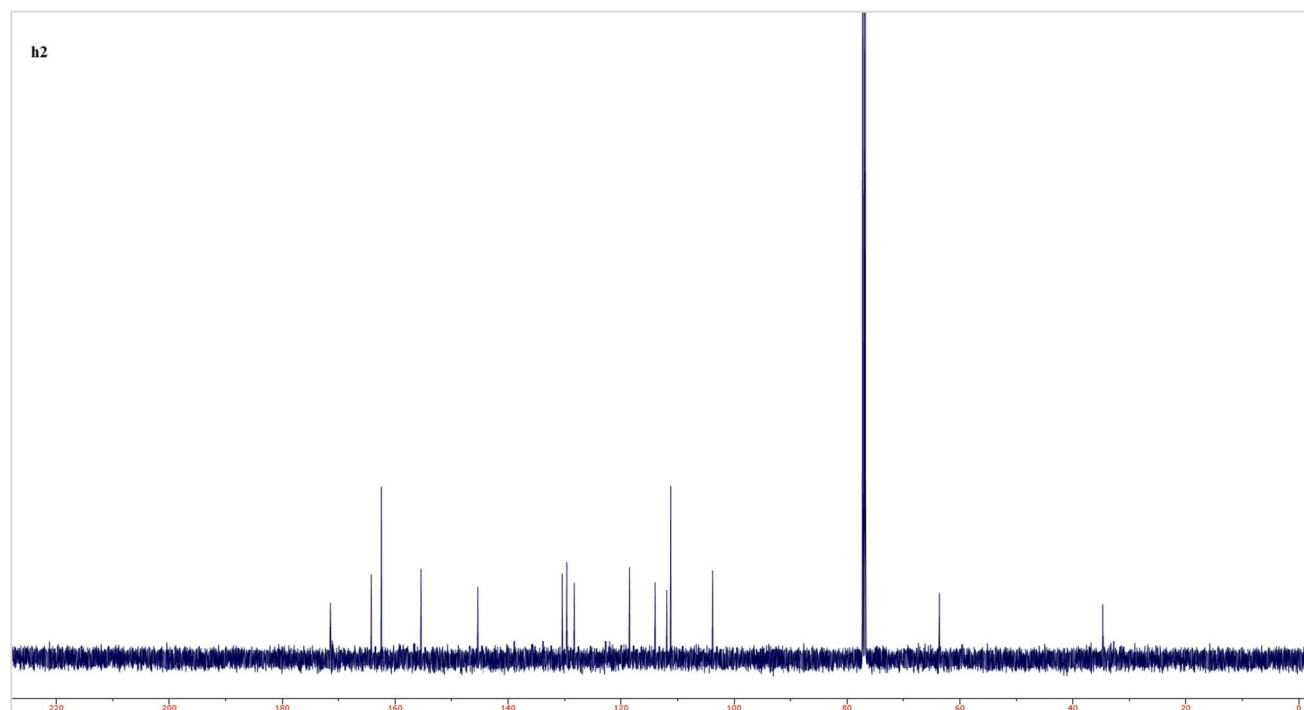

# Compound 19

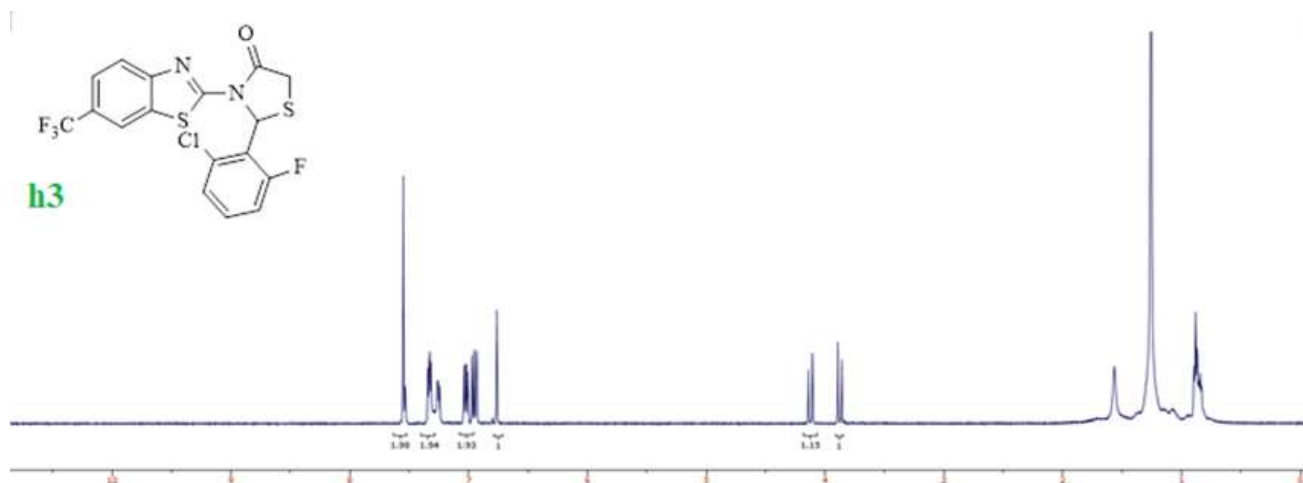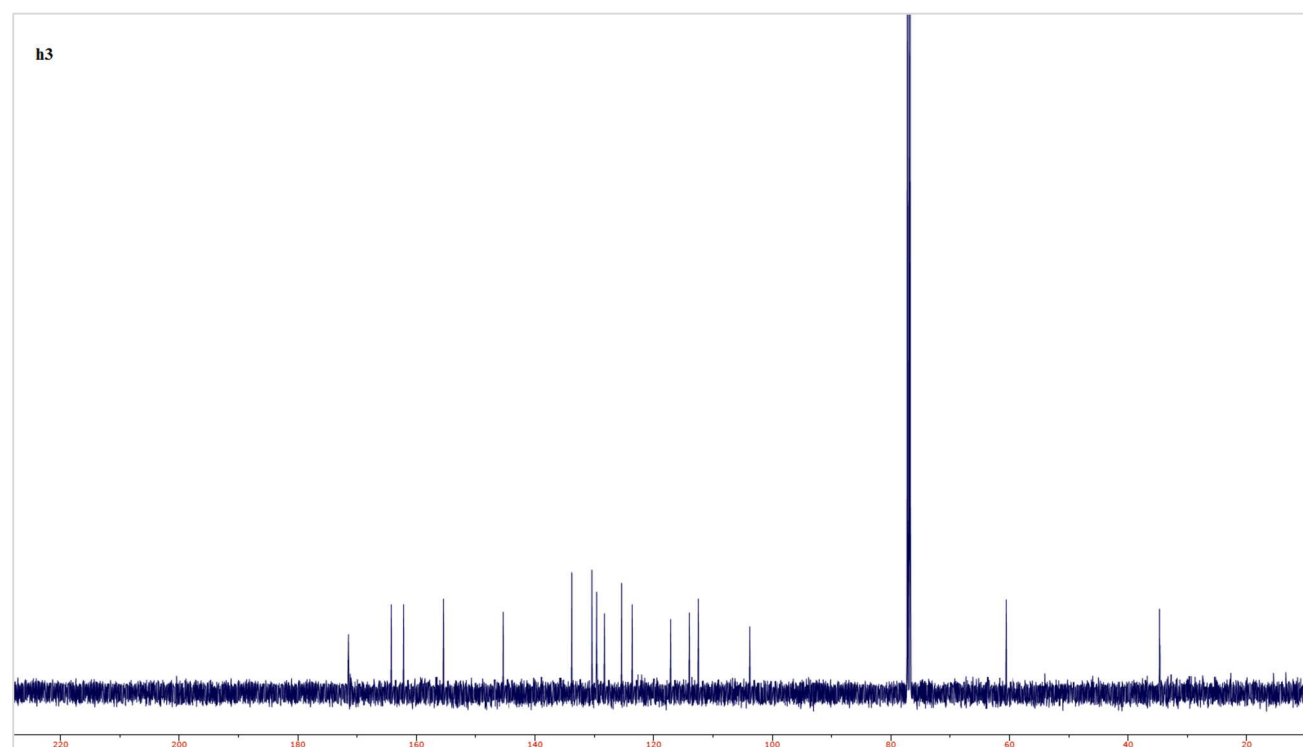

# Compound 20

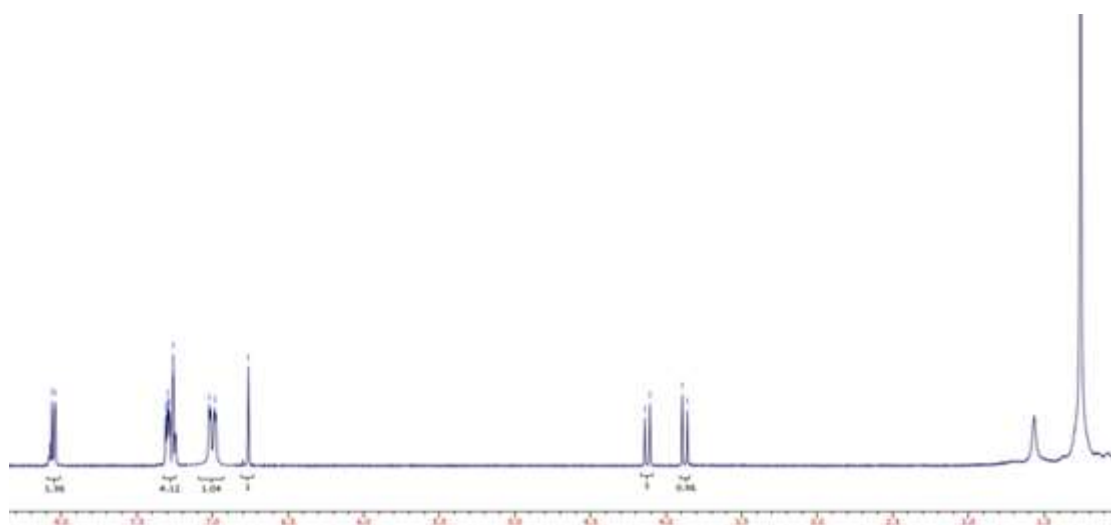

h7

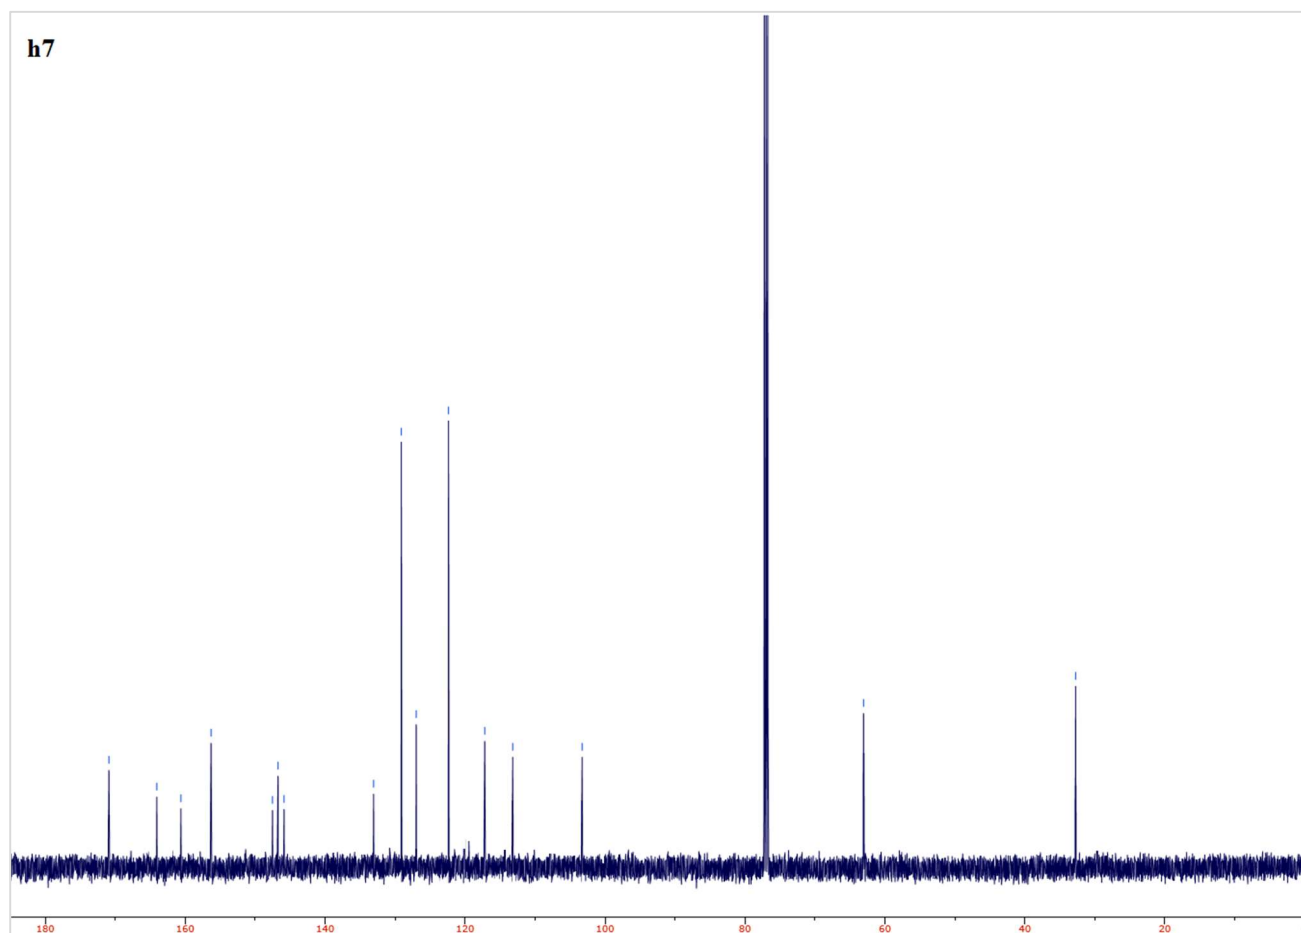

# Compound 21

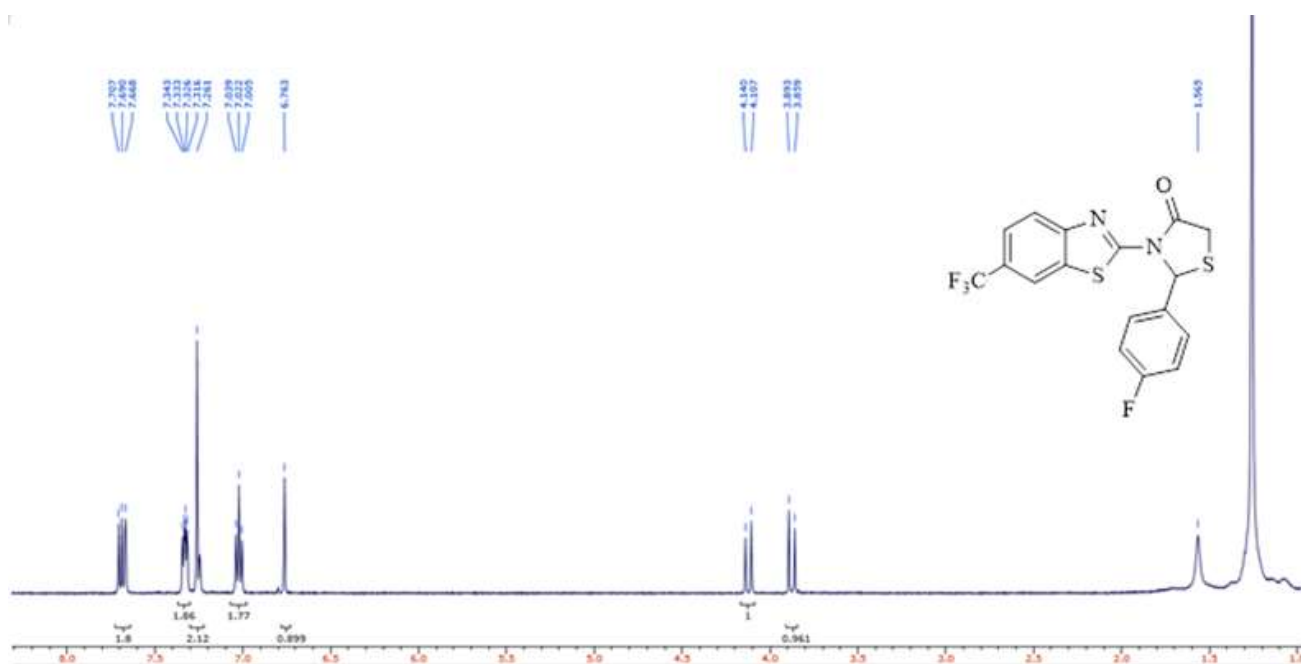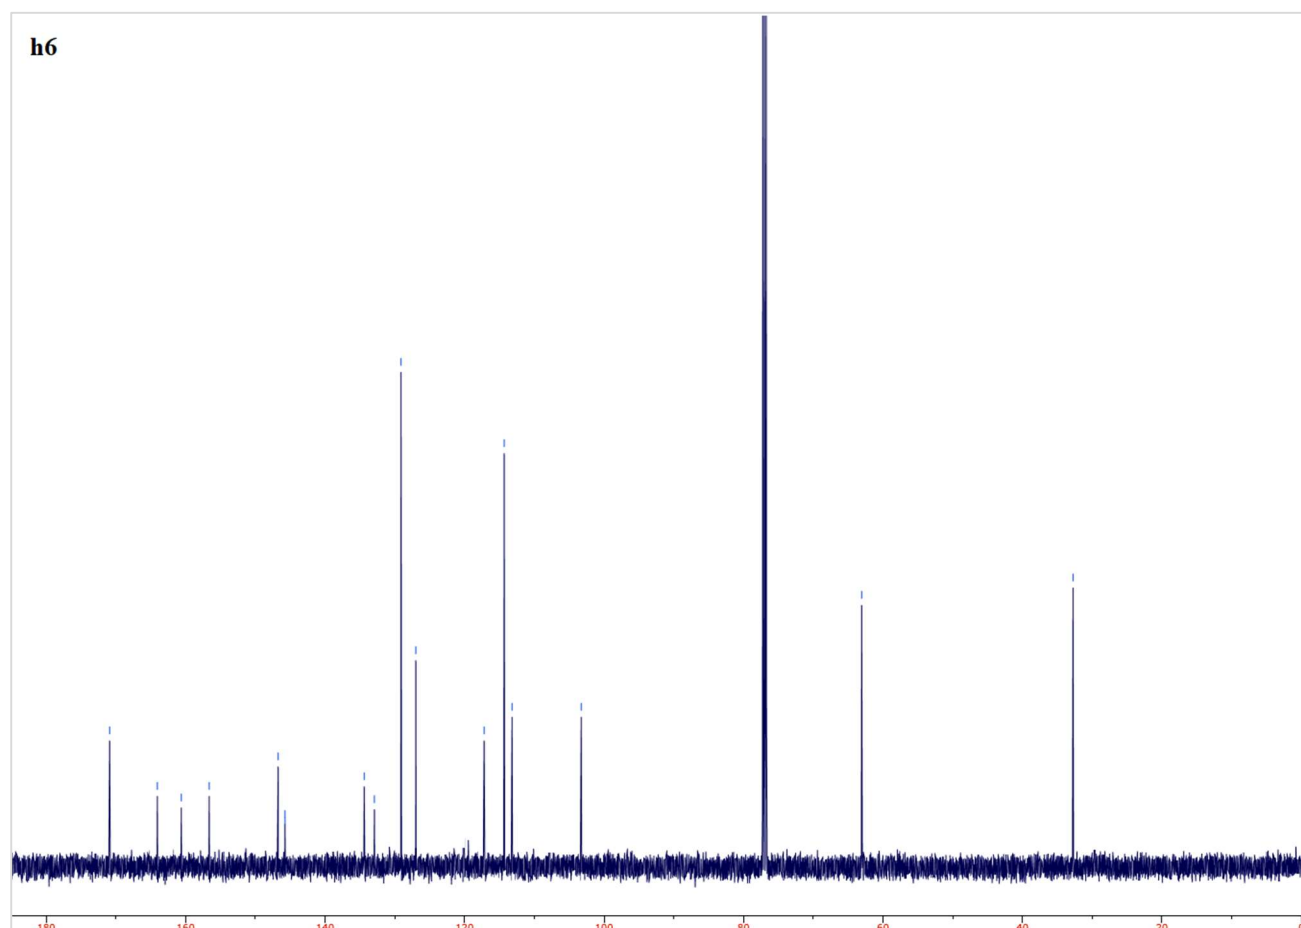

Supplement: s1 [file s1]
